# Supplementary material for: Interactive Toxicogenomics: Gene set discovery, clustering and analysis in Toxygates
Source: PubMed Central journal article supplement (PMC5431224; doi:10.1038/s41598-017-01500-1), 2017-05-03
Supplement: 41598_2017_1500_MOESM2_ESM.pdf [file 41598_2017_1500_MOESM2_ESM.pdf]

*Interactive Toxicogenomics: Gene Set Discovery, Clustering and Analysis in Toxygates*

Nyström-Persson, J., Natsume-Kitatani, Y., Igarashi, Y., Satoh, D., and Mizuguchi, K.

## Supplementary Methods

This supplementary document includes the details of the analytical flow in our case study in which the new analytical functions in Toxygates were utilized.

For the figures of heatmap and the interpretation of the obtained results, please refer to the main manuscript. For the general tutorial for Toxygates, please refer to the user guide (<http://toxygates.nibiohn.go.jp/toxygates/toxygatesManual.pdf>)

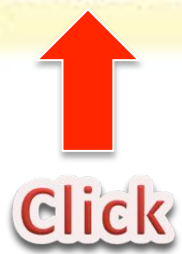

# Toxygates

Toxygates is an integrated platform for toxicogenomics data analysis. For more information, please see [our Bioinformatics paper](#), or use the help menu.

## 2016-10-20 ("v2.0")

Several major new features have now been released.

- A clustering and heat-map visualisation feature has been added.
- Users may now upload their own data and analyse it alongside existing data in Toxygates.
- KEGG pathways and GO terms are now updated automatically on a weekly basis.

With the addition of user data uploads and clustering/visualisation, Toxygates is now a much more powerful analysis environment than previously, and we urge users to try these functions for themselves.

For more information, please see the [user guide](#), or use the help menu.

[Click here to begin.](#)

① Select rat/in vivo/Liver/Repeat

Tools Help / feedback

Start **Sample groups** View data Comp Ranking Pathologies Sample details My data

Please define at least one sample group to proceed. Start selecting compounds to the left. Then select doses and times.

Data:

Compound

③ Select M dose/4 day

Rat/in vivo/Liver/Repeat/

Low Middle High

All  4 day  8 day  15 day  29 day

WY-14643  3/3  3/3  3/3  3/3 All  4 day  8 day  15 day  29 day  3/3  3/3  3/3  3/3 All

Save group WY-14643\_M\_4day Save

④ Save

② Select WY-14643

Click to see available lists Save Delete

Edit/paste

Browse

- 1% cholesterol + 0.25% sodium cholate
- 2,4-dinitrophenol
- WY-14643
- acarbose
- acetamide
- acetamidofluorene
- acetaminophen
- asparin
- ajmaline
- allopurinol
- allyl alcohol
- amiodarone
- amitriptyline
- amphotericin B
- aspirin
- azathioprine

Sort by name Select all Unselect all

| Active                              | Group            | #Treated samples | #Control samples | Edit | Delete |
|-------------------------------------|------------------|------------------|------------------|------|--------|
| <input checked="" type="checkbox"/> | WY-14643_M_15day | 3                | 3                | Edit | Delete |
| <input checked="" type="checkbox"/> | WY-14643_M_24hr  | 3                | 3                | Edit | Delete |
| <input checked="" type="checkbox"/> | WY-14643_M_29day | 3                | 3                | Edit | Delete |
| <input checked="" type="checkbox"/> | WY-14643_M_3hr   | 3                | 3                | Edit | Delete |
| <input checked="" type="checkbox"/> | WY-14643_M_4day  | 3                | 3                | Edit | Delete |
| <input checked="" type="checkbox"/> | WY-14643_M_8hr   | 3                | 3                | Edit | Delete |
| <input checked="" type="checkbox"/> | WY-14643_M_8day  | 3                | 3                | Edit | Delete |
| <input checked="" type="checkbox"/> | WY-14643_M_9hr   | 3                | 3                | Edit | Delete |

⑤ Save the other WY-14643 data as well.

Delete all groups Next: View data **Click**

# Observed pathologies as starting point

Tools [Help / feedback](#)

Start **Sample groups** View data Compound ranking **Pathologies** Sample details My data

Please define at least one sample group to proceed. Start by selecting compounds to the list. Then select doses and times.

Data... Rat  in vivo  Liver  Repeat

Compound

Click to see available lists

Edit/paste

Browse

- 1% cholesterol + 0.25% sodium cholate
- 2,4-dinitrophenol
- WY-14643
- acarbose
- acetamide
- acetamidofluorene
- acetaminophen
- acetazolamide
- adapin
- ajmaline
- allopurinol
- allyl alcohol
- amlodarone
- amitriptyline
- amphotericin B
- aspirin
- azathioprine

Rat/in vivo/Liver/Repeat

Low Middle High

All  4 day  8 day  15 day  29 day  4 day  8 day  15 day  29 day  4 day  8 day  15 day  29 day

WY-14643  3/3  3/3  3/3  3/3  All  3/3  3/3  3/3  3/3  All  3/3  3/3  3/3  3/3  All

Save group as

| Active                              | Group            | #Treated samples | #Control samples |                                     |                                       |
|-------------------------------------|------------------|------------------|------------------|-------------------------------------|---------------------------------------|
| <input checked="" type="checkbox"/> | WY-14643_M_15day | 3                | 3                | <input type="button" value="Edit"/> | <input type="button" value="Delete"/> |
| <input type="checkbox"/>            | WY-14643_M_3hr   | 3                | 3                | <input type="button" value="Edit"/> | <input type="button" value="Delete"/> |
| <input checked="" type="checkbox"/> | WY-14643_M_29day | 3                | 3                | <input type="button" value="Edit"/> | <input type="button" value="Delete"/> |
| <input type="checkbox"/>            | WY-14643_M_3hr   | 3                | 3                | <input type="button" value="Edit"/> | <input type="button" value="Delete"/> |
| <input checked="" type="checkbox"/> | WY-14643_M_4day  | 3                | 3                | <input type="button" value="Edit"/> | <input type="button" value="Delete"/> |
| <input type="checkbox"/>            | WY-14643_M_9hr   | 3                | 3                | <input type="button" value="Edit"/> | <input type="button" value="Delete"/> |
| <input checked="" type="checkbox"/> | WY-14643_M_8day  | 3                | 3                | <input type="button" value="Edit"/> | <input type="button" value="Delete"/> |
| <input type="checkbox"/>            | WY-14643_M_9hr   | 3                | 3                | <input type="button" value="Edit"/> | <input type="button" value="Delete"/> |

Sort by name

② Click

① Select repeat dose data

This is the list of pathologies in the sample groups you have defined. Click on an icon to see detailed sample information.

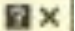

[WY-14643\\_M\\_15day](#) [WY-14643/Middle/15 day](#) [WY-14643\\_M\\_29day](#) [WY-14643/Middle/29 day](#) [WY-14643\\_M\\_4day](#) [WY-14643/Middle/4 day](#) [WY-14643\\_M\\_8day](#) [WY-14643/Middle/8 day](#)

[Pathology terms reference](#)

| Group            | Sample                           | Finding                              | Topography              | Grade        | Spontaneous | Digital viewer         |
|------------------|----------------------------------|--------------------------------------|-------------------------|--------------|-------------|------------------------|
| WY-14643_M_15day | WY-14643/Middle/15 day/undefined | Degeneration, granular, eosinophilic | Hepatocyte              | Severe (+++) | false       | <a href="#">Viewer</a> |
| WY-14643_M_15day | WY-14643/Middle/15 day/undefined | Degeneration, granular, eosinophilic | Hepatocyte              | Severe (+++) | false       | <a href="#">Viewer</a> |
| WY-14643_M_15day | WY-14643/Middle/15 day/undefined | Degeneration, granular, eosinophilic | Hepatocyte              | Severe (+++) | false       | <a href="#">Viewer</a> |
| WY-14643_M_15day | WY-14643/Middle/15 day/undefined | Necrosis                             | Hepatocyte              | Minimal (±)  | false       | <a href="#">Viewer</a> |
| WY-14643_M_15day | WY-14643/Middle/15 day/undefined | Hypertrophy                          | Bile duct, interlobular | Slight (+)   | false       | <a href="#">Viewer</a> |
| WY-14643_M_8day  | WY-14643/Middle/8 day/undefined  | Single cell necrosis                 | Hepatocyte              | Minimal (±)  | false       | <a href="#">Viewer</a> |
| WY-14643_M_8day  | WY-14643/Middle/8 day/undefined  | Degeneration, granular, eosinophilic | Hepatocyte              | Severe (+++) | false       | <a href="#">Viewer</a> |
| WY-14643_M_8day  | WY-14643/Middle/8 day/undefined  | Degeneration, granular, eosinophilic | Hepatocyte              | Severe (+++) | false       | <a href="#">Viewer</a> |
| WY-14643_M_8day  | WY-14643/Middle/8 day/undefined  | Degeneration, granular, eosinophilic | Hepatocyte              | Severe (+++) | false       | <a href="#">Viewer</a> |
| WY-14643_M_8day  | WY-14643/Middle/8 day/undefined  | Hypertrophy                          | Bile duct, interlobular | Slight (+)   | false       | <a href="#">Viewer</a> |
| WY-14643_M_15day | WY-14643/Middle/15 day/undefined | Hypertrophy                          | Bile duct, interlobular | Minimal (±)  | false       | <a href="#">Viewer</a> |
| WY-14643_M_15day | WY-14643/Middle/15 day/undefined | Hypertrophy                          | Bile duct, interlobular | Minimal (±)  | false       | <a href="#">Viewer</a> |
| WY-14643_M_29day | WY-14643/Middle/29 day/undefined | Necrosis                             | Hepatocyte              | Slight (+)   | false       | <a href="#">Viewer</a> |
| WY-14643_M_4day  | WY-14643/Middle/4 day/undefined  | Increased mitosis                    | Hepatocyte              | Slight (+)   | false       | <a href="#">Viewer</a> |
| WY-14643_M_4day  | WY-14643/Middle/4 day/undefined  | Increased mitosis                    | Hepatocyte              | Slight (+)   | false       | <a href="#">Viewer</a> |
| WY-14643_M_29day | WY-14643/Middle/29 day/undefined | Hypertrophy                          | Bile duct, interlobular | Minimal (±)  | false       | <a href="#">Viewer</a> |
| WY-14643_M_29day | WY-14643/Middle/29 day/undefined | Degeneration, granular, eosinophilic | Hepatocyte              | Severe (+++) | false       | <a href="#">Viewer</a> |
| WY-14643_M_29day | WY-14643/Middle/29 day/undefined | Hypertrophy                          | Bile duct, interlobular | Slight (+)   | false       | <a href="#">Viewer</a> |
| WY-14643_M_29day | WY-14643/Middle/29 day/undefined | Degeneration, granular, eosinophilic | Hepatocyte              | Severe (+++) | false       | <a href="#">Viewer</a> |
| WY-14643_M_29day | WY-14643/Middle/29 day/undefined | Hypertrophy                          | Bile duct, interlobular | Slight (+)   | false       | <a href="#">Viewer</a> |
| WY-14643_M_29day | WY-14643/Middle/29 day/undefined | Degeneration, granular, eosinophilic | Hepatocyte              | Severe (+++) | false       | <a href="#">Viewer</a> |

**Supplementary Table 1: summary of this table**

# Cluster analysis

Tools [Help / feedback](#)

Start **Sample groups** | [View data](#) | [Compound ranking](#) | [Pathologies](#) | [Sample details](#) | [My data](#)

Please define at least one sample group to proceed. Start by selecting compounds to the left. Then select doses and times.

Data... [Rat](#) [In vivo](#) [Liver](#) [Repeat](#)

Compound Sample group definition - new group

**Edit/paste**

**Browse**

- 1% cholesterol + 0.25% sodium cholate
- 2,4-dinitrophenol
- WY-14643
- acarbose
- acetamide
- acetamidofluorene
- acetaminophen
- acetazolamide
- adapin
- ajmaline
- allopurinol
- allyl alcohol
- amiodarone
- amitriptyline
- amphotericin B
- aspirin
- azathioprine

**Rat/in vivo/Liver/Repeat/**

**Low**  4 day  8 day  15 day  29 day

**Middle**  4 day  8 day  15 day  29 day

**High**  4 day  8 day  15 day  29 day

**WY-14643**

3/3  3/3  3/3  3/3  All

3/3  3/3  3/3  3/3  All

3/3  3/3  3/3  3/3  All

| Active                              | Group            | #Treated samples | #Control samples |                                     |                                       |
|-------------------------------------|------------------|------------------|------------------|-------------------------------------|---------------------------------------|
| <input checked="" type="checkbox"/> | WY-14643_M_15day | 3                | 3                | <input type="button" value="Edit"/> | <input type="button" value="Delete"/> |
| <input checked="" type="checkbox"/> | WY-14643_M_24hr  | 3                | 3                | <input type="button" value="Edit"/> | <input type="button" value="Delete"/> |
| <input checked="" type="checkbox"/> | WY-14643_M_29day | 3                | 3                | <input type="button" value="Edit"/> | <input type="button" value="Delete"/> |
| <input checked="" type="checkbox"/> | WY-14643_M_3hr   | 3                | 3                | <input type="button" value="Edit"/> | <input type="button" value="Delete"/> |
| <input checked="" type="checkbox"/> | WY-14643_M_4day  | 3                | 3                | <input type="button" value="Edit"/> | <input type="button" value="Delete"/> |
| <input checked="" type="checkbox"/> | WY-14643_M_8hr   | 3                | 3                | <input type="button" value="Edit"/> | <input type="button" value="Delete"/> |
| <input checked="" type="checkbox"/> | WY-14643_M_6day  | 3                | 3                | <input type="button" value="Edit"/> | <input type="button" value="Delete"/> |
| <input checked="" type="checkbox"/> | WY-14643_M_9hr   | 3                | 3                | <input type="button" value="Edit"/> | <input type="button" value="Delete"/> |

① Select all

② Click

Here you can inspect expression values for the sample groups you have defined. Click on column headers to sort data.

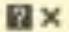

In case of M/15 day

① Click this icon

WY-14643\_M\_15day | WY-14643\_M\_29day | WY-14643/Middle/29 day | WY-14643\_M\_3hr | WY-14643/Middle/3 hr

WY-14643\_M\_4day | WY-14643/Middle/4 day | Show all

Log2 (data change)

1-25 of 31,042

Show More

Use columns All Probes

| Gene Symbol         | Probe Title                                           | Probe        | WY-14643_M_15day | WY-14643_M_29day | WY-14643_M_3hr | WY-14643_M_4day | WY-14643 |
|---------------------|-------------------------------------------------------|--------------|------------------|------------------|----------------|-----------------|----------|
| Aco1                | acyl-CoA thioesterase 1                               | 1388250_at   | 10.307           | 11.123           | 10.505         | 4.058           | 10.941   |
| Aqp3                | aquaporin 3                                           | 1387100_at   | 8.305            | (absent)         | 6.004          | (absent)        | 7.409    |
| LOC100911217        | adipogenin-like                                       | 1378296_at   | 6.15             | (absent)         | 6.052          | (absent)        | 5.391    |
|                     |                                                       | 1384474_at   | 7.818            | 4.673            | 6.932          | (absent)        | 6.184    |
| Chra2               | cholinergic receptor - nicotinic - alpha 2 (neuronal) | 1387574_at   | 7.573            | 2.526            | 6.721          | (absent)        | 3.357    |
| Hdc                 | histidine decarboxylase                               | 1370491_a_at | 7.257            | 5.121            | 7.385          | (absent)        | 7.247    |
| Fabp3               | fatty acid binding protein 3 - muscle and heart       | 1387660_at   | 6.833            | 2.382            | 6.71           | (absent)        | 6.627    |
| RGD1305928          | hypothetical LOC300207                                | 1380536_at   | 6.615            | 3.226            | 6.8            | (absent)        | 5.616    |
| Aco1<br>Aco2        | acyl-CoA thioesterase 1                               | 1388211_s_at | 6.489            | 5.552            | 6.187          | 2.2             | 6.76     |
| Fbp2                | fructose-1-6-bisphosphatase 2                         | 1388622_at   | 6.078            | 3.961            | 5.799          | (absent)        | 4.471    |
| Abhd3               | abhydrolase domain containing 3                       | 1382137_at   | 5.922            | 1.266            | 4.062          | (absent)        | 5.105    |
|                     |                                                       | 1383757_at   | 5.757            | (absent)         | 5.399          | (absent)        | (absent) |
| Cpt1b               | camitine palmitoyltransferase 1b - muscle             | 1387742_at   | 5.648            | 2.503            | 5.414          | (absent)        | 5.372    |
| Aqp7                | aquaporin 7                                           | 1388317_at   | 5.538            | 1.84             | 4.887          | (absent)        | 4.852    |
| Spink3              | serine peptidase inhibitor - Kazal type 3             | 1388447_x_at | 5.097            | 1.607            | 4.123          | 0.076           | 1.297    |
| LOC100912489<br>Scd | acyl-CoA desaturase 2-like                            | 1387668_a_at | 4.998            | 0.038            | 6.296          | -0.322          | 0.636    |

Here you can inspect expression values for the sample groups you have defined. Click on column headers to sort data.

WY-14643\_M\_15day WY-14643\_Middle/15 day WY-14643\_M\_24hr WY-14643/Middle/24 hr WY-14643\_M\_29day WY-14643/Middle/29 day WY-14643\_M\_3hr WY-14643/Middle/3 hr

WY-14643\_M\_4day WY-14643

log2 (fold change)

① New pop-up window

② Input 1.5

② Click

| Gene Symbol  | Probe Title                                           |              | WY-14643_M... | WY-14643_M... | WY-14643_M... | WY-14643_M... | WY-14643... |
|--------------|-------------------------------------------------------|--------------|---------------|---------------|---------------|---------------|-------------|
| Acot1        | acyl-CoA thioesterase 1                               | 1367742_at   | 50.307        | 11.523        | 10.505        | 4.068         | 50.941      |
| Aqp3         | aquaporin 3                                           | 1367100_at   | 8.390         | (absent)      | (absent)      | (absent)      | 7.499       |
| LOC100911217 | adipogenin-like                                       | 1176         | (absent)      | (absent)      | 6.932         | (absent)      | 5.391       |
| Chra2        | cholinergic receptor - nicotinic - alpha 2 (neuronal) | 1194         | (absent)      | (absent)      | 6.721         | (absent)      | 3.357       |
| Hdc          | histidine decarboxylase                               | 1187         | (absent)      | (absent)      | 7.385         | (absent)      | 7.247       |
| Fabp3        | fatty acid binding protein 3 - muscle and heart       | 117C         | (absent)      | (absent)      | 6.71          | (absent)      | 6.627       |
| RGD1305928   | hypothetical LOC300207                                | 1367096_at   | (absent)      | (absent)      | 6.9           | (absent)      | 5.616       |
| Acot1        | acyl-CoA thioesterase 1                               | 1366211_x_at | (absent)      | 5.802         | 6.187         | 2.2           | 6.76        |
| Acot2        | acyl-CoA thioesterase 2                               | 136622_at    | 4.078         | 3.991         | 5.790         | (absent)      | 4.471       |
| Fbp2         | fructose-1,6-bisphosphatase 2                         | 136622_at    | 4.078         | 3.991         | 5.790         | (absent)      | 4.471       |
| Ashd3        | abhydrolase domain containing 3                       | 136622_at    | 4.078         | 3.991         | 5.790         | (absent)      | 4.471       |
| Cpt1b        | camitine palmitoyltransferase 1b - muscle             | 1367742_at   | 5.648         | 2.803         | 5.414         | (absent)      | 5.372       |
| Aqp7         | aquaporin 7                                           | 1368317_at   | 5.638         | 1.84          | 4.887         | (absent)      | 4.852       |
| Spink3       | serine peptidase inhibitor - Kazal type 3             | 1368447_x_at | 5.097         | 1.887         | 4.123         | 0.076         | 1.297       |
| LOC100912469 | acyl-CoA desaturase 2-like                            | 1367668_x_at | 4.586         | 0.038         | 6.298         | -0.322        | 0.636       |



② Click

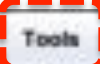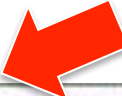

File Gene Sets View **Tools** Help / feedback

Start | **Sample groups** | **View data** | Compound ranking | Pathologies | Sample details | My data

Here you can inspect expression values for the sample groups you have defined. Click on column headers to sort data.

WY-14643\_M\_15day .WY-14643/Middle/15 day WY-14643\_M\_24hr .WY-14643/Middle/24 hr WY-14643\_M\_29day .WY-14643/Middle/29 day WY-14643\_M\_3hr .WY-14643/Middle/3 hr

WY-14643\_M\_4day .WY-14643/Middle/4 day Show all

Log2 (fold change) 1-25 of 420 Show More p-value columns All Probes New Edit

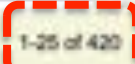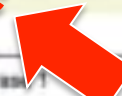

① 420 probes are extracted

| Gene Symbol         | Probe Title                                           | Probe        | WY-14643_M... | WY-14643_M... | WY-14643_M... | WY-14643_M... | WY-14643... |
|---------------------|-------------------------------------------------------|--------------|---------------|---------------|---------------|---------------|-------------|
| Aco1                | acyl-CoA thioesterase 1                               | 136250_at    | 10.307        | 11.123        | 10.505        | 4.068         | 10.941      |
| Aqp3                | aquaporin 3                                           | 1370298_at   | 8.95          | (absent)      | 6.052         | (absent)      | 7.499       |
| LOC100911217        | adipogenin-like                                       | 1384674_at   | 7.818         | 4.972         | 6.932         | (absent)      | 6.184       |
| Chra2               | cholinergic receptor - nicotinic - alpha 2 (neuronal) | 1387574_at   | 7.573         | 2.529         | 6.721         | (absent)      | 3.357       |
| Hdc                 | histidine decarboxylase                               | 1370491_a_at | 7.257         | 3.121         | 7.365         | (absent)      | 7.247       |
| Fabp3               | fatty acid binding protein 3 - muscle and heart       | 1367660_at   | 6.833         | 2.382         | 6.71          | (absent)      | 6.627       |
| RGD1305928          | hypothetical LOC300207                                | 1380536_at   | 6.815         | 3.226         | 6.9           | (absent)      | 6.858       |
| Aco1<br>Aco2        | acyl-CoA thioesterase 1                               | 1368211_a_at | 6.489         | 5.262         | 6.167         | 2.2           | 6.76        |
| Fbp2                | fructose-1,6-bisphosphatase 2                         | 1368222_at   | 6.078         | 3.951         | 5.798         | (absent)      | 4.471       |
| Abhd3               | abhydrolase domain containing 3                       | 1382137_at   | 5.922         | 1.298         | 4.042         | (absent)      | 5.105       |
|                     |                                                       | 1383757_at   | 5.757         | (absent)      | 5.389         | (absent)      | (absent)    |
| Cpt1b               | camitine palmitoyltransferase 1b - muscle             | 1367742_at   | 5.648         | 2.853         | 5.414         | (absent)      | 5.372       |
| Aqp7                | aquaporin 7                                           | 1368317_at   | 5.638         | 1.64          | 4.667         | (absent)      | 4.852       |
| Spink3              | serine peptidase inhibitor - Kazal type 3             | 1368447_x_at | 5.097         | 1.887         | 4.123         | 0.076         | 1.297       |
| LOC100912489<br>Scd | acyl-CoA desaturase 2-like                            | 1367668_a_at | 4.986         | 0.036         | 6.298         | -0.322        | 0.636       |

Here you can inspect expression

- Compare two sample groups
- Enrichment
- Show heat map
- Show a

WY-14643\_M\_16day\_WY-14643 Middle29 hr WY-14643\_M\_29day\_WY-14643/Middle29 day WY-14643\_M\_3hr\_WY-14643/Middle3 hr

WY-14643\_M\_4day\_WY-14643/Middle4 day

Log2 (fold change) 1 1-25 of 420 All Probes New Edit

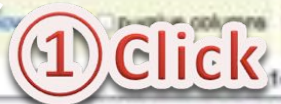

| Gene Symbol  | Probe Title                                           | WY-14643_M_... | WY-14643_M_... | WY-14643_M_... | WY-14643_M_... | WY-14643_M_... |
|--------------|-------------------------------------------------------|----------------|----------------|----------------|----------------|----------------|
| Aco1         | acyl-CoA thioesterase 1                               | 1368250_at     | 10.307         | 11.123         | 10.505         | 4.068          |
| Aqp3         | aquaporin 3                                           | 1367100_at     | 8.300          | (absent)       | 6.004          | (absent)       |
| LOC100911217 | adipogenin-like                                       | 1376296_at     | 8.18           | (absent)       | 6.052          | (absent)       |
|              |                                                       | 1364474_at     | 7.818          | 4.972          | 6.932          | (absent)       |
| Chra2        | cholinergic receptor - nicotinic - alpha 2 (neuronal) | 1367574_at     | 7.573          | 2.529          | 6.721          | (absent)       |
| Hdc          | histidine decarboxylase                               | 1370491_a_at   | 7.257          | 6.121          | 7.365          | (absent)       |
| Fatp3        | fatty acid binding protein 3 - muscle and heart       | 1367660_at     | 6.833          | 2.340          | 6.71           | (absent)       |
| RGD1308928   | hypothetical LOC300207                                | 1360536_at     | 6.615          | 3.226          | 6.9            | (absent)       |
| Aco1         | acyl-CoA thioesterase 1                               | 1368211_a_at   | 6.489          | 6.952          | 6.187          | 2.2            |
| Aco2         |                                                       |                |                |                |                | 6.76           |
| Fbp2         | fructose-1,6-bisphosphatase 2                         | 1368622_at     | 6.078          | 3.901          | 5.799          | (absent)       |
| Abhd3        | abhydrolase domain containing 3                       | 1362137_at     | 5.922          | 1.266          | 4.042          | (absent)       |
|              |                                                       | 1363757_at     | 5.757          | (absent)       | 5.399          | (absent)       |
| Cpt1b        | camitine palmitoyltransferase 1b - muscle             | 1367742_at     | 5.648          | 2.553          | 5.414          | (absent)       |
| Aqp7         | aquaporin 7                                           | 1366317_at     | 5.638          | 1.84           | 4.667          | (absent)       |
| Spink3       | serine peptidase inhibitor - Kazal type 3             | 1368447_x_at   | 5.097          | 1.887          | 4.123          | 0.076          |
| LOC100912469 | acyl-CoA desaturase 2-like                            | 1367668_a_at   | 4.986          | 0.036          | 6.296          | -0.322         |
| Scd          |                                                       |                |                |                |                | 0.638          |

# ① New pop-up window appears

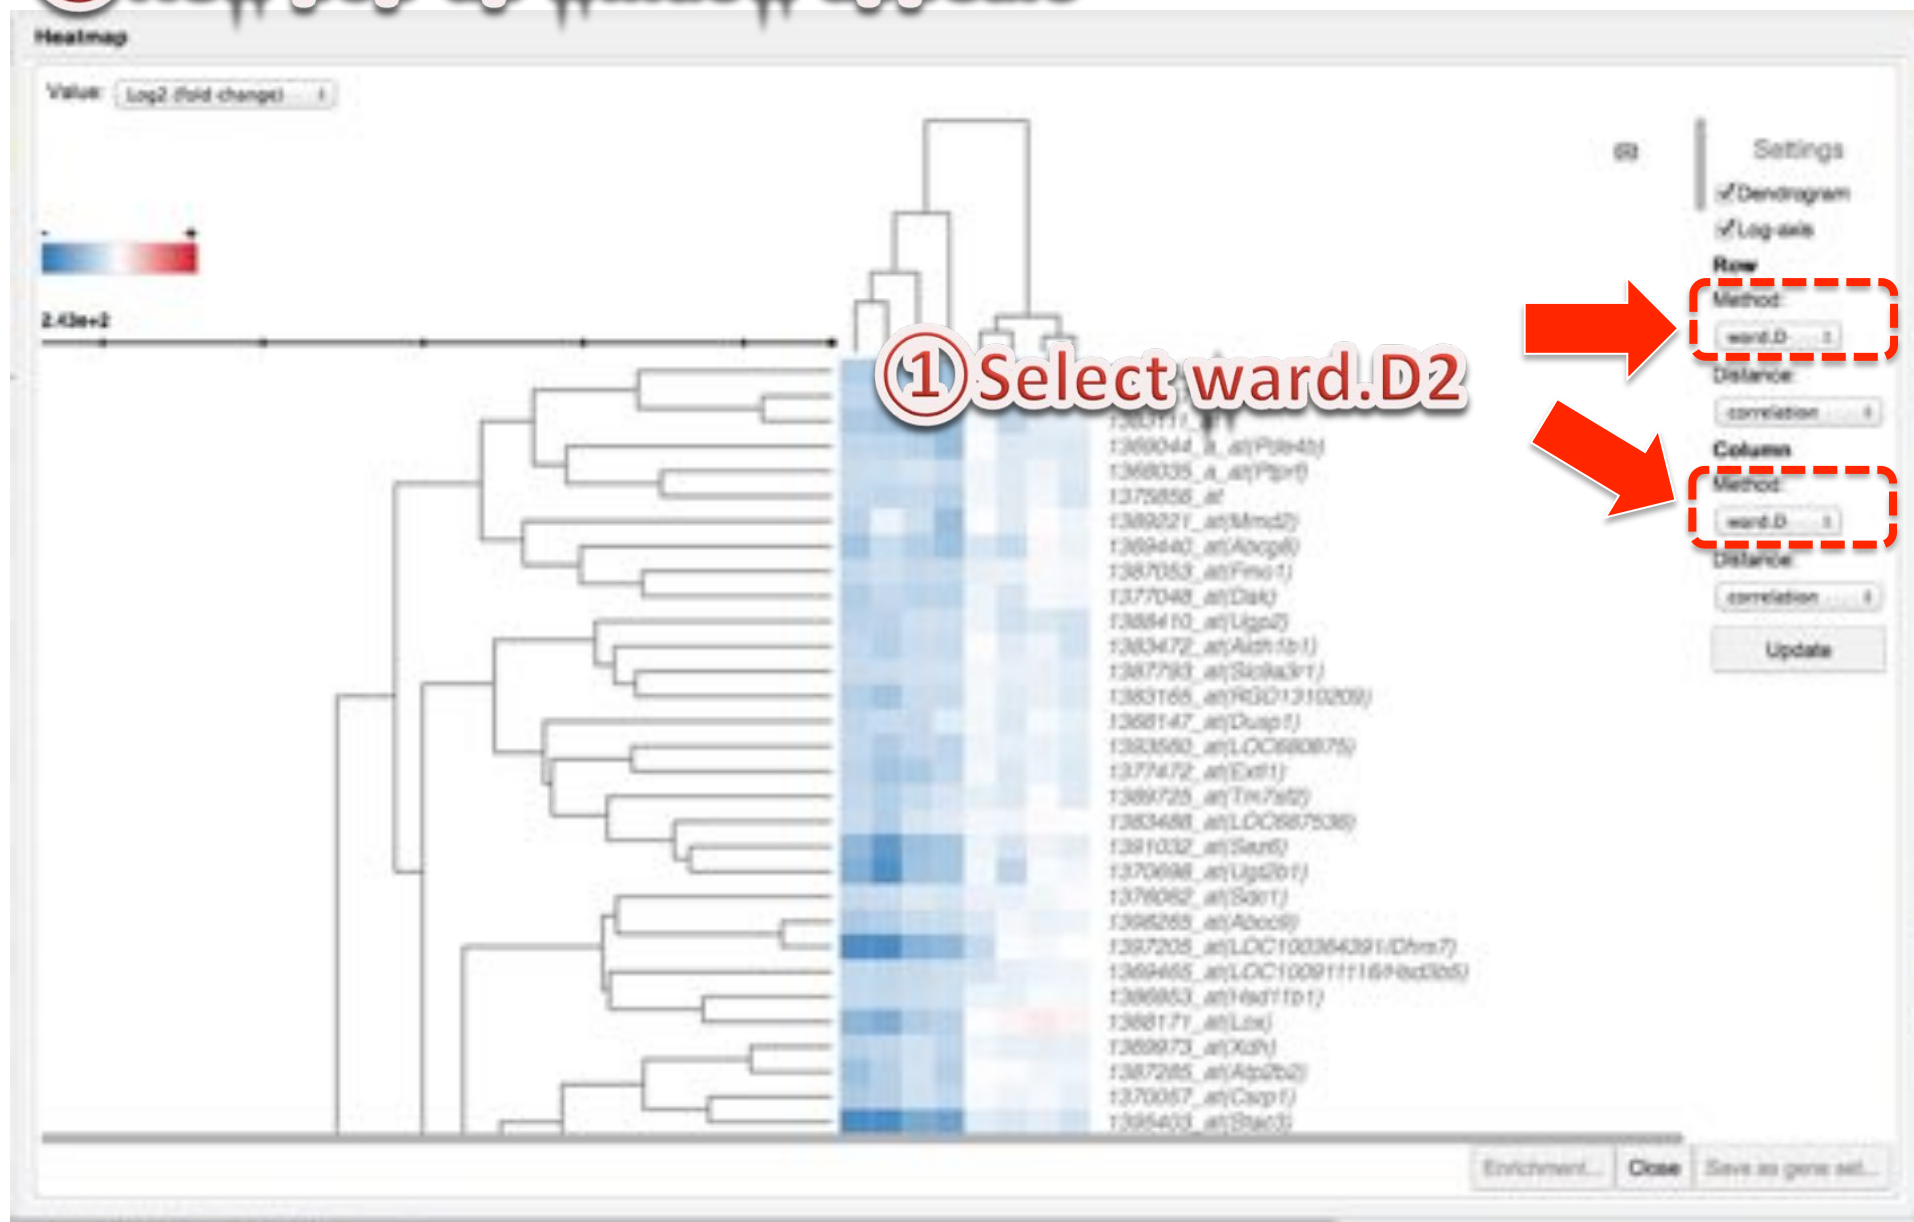

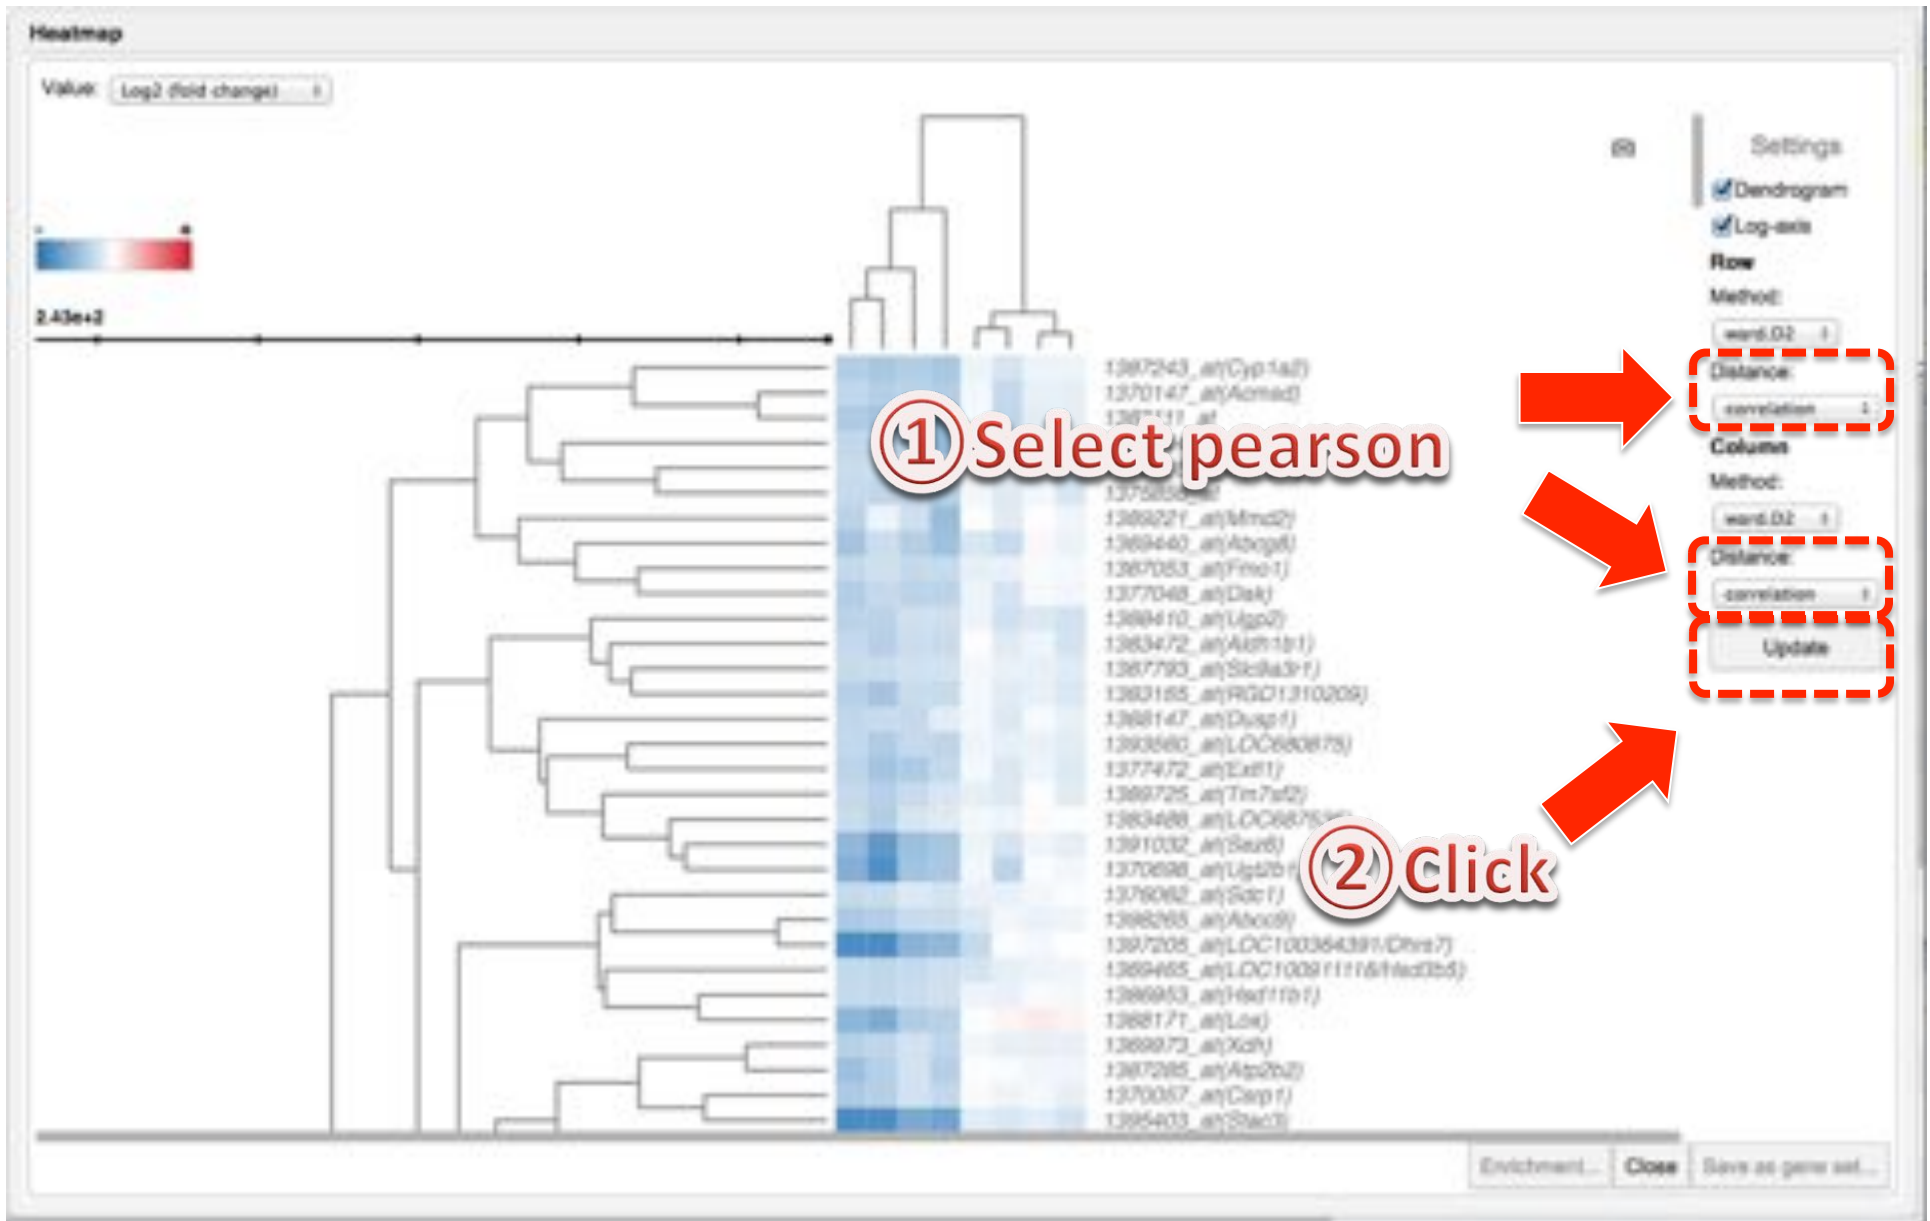

① Heatmap is updated

② Select cut-off=4 by pointing and click

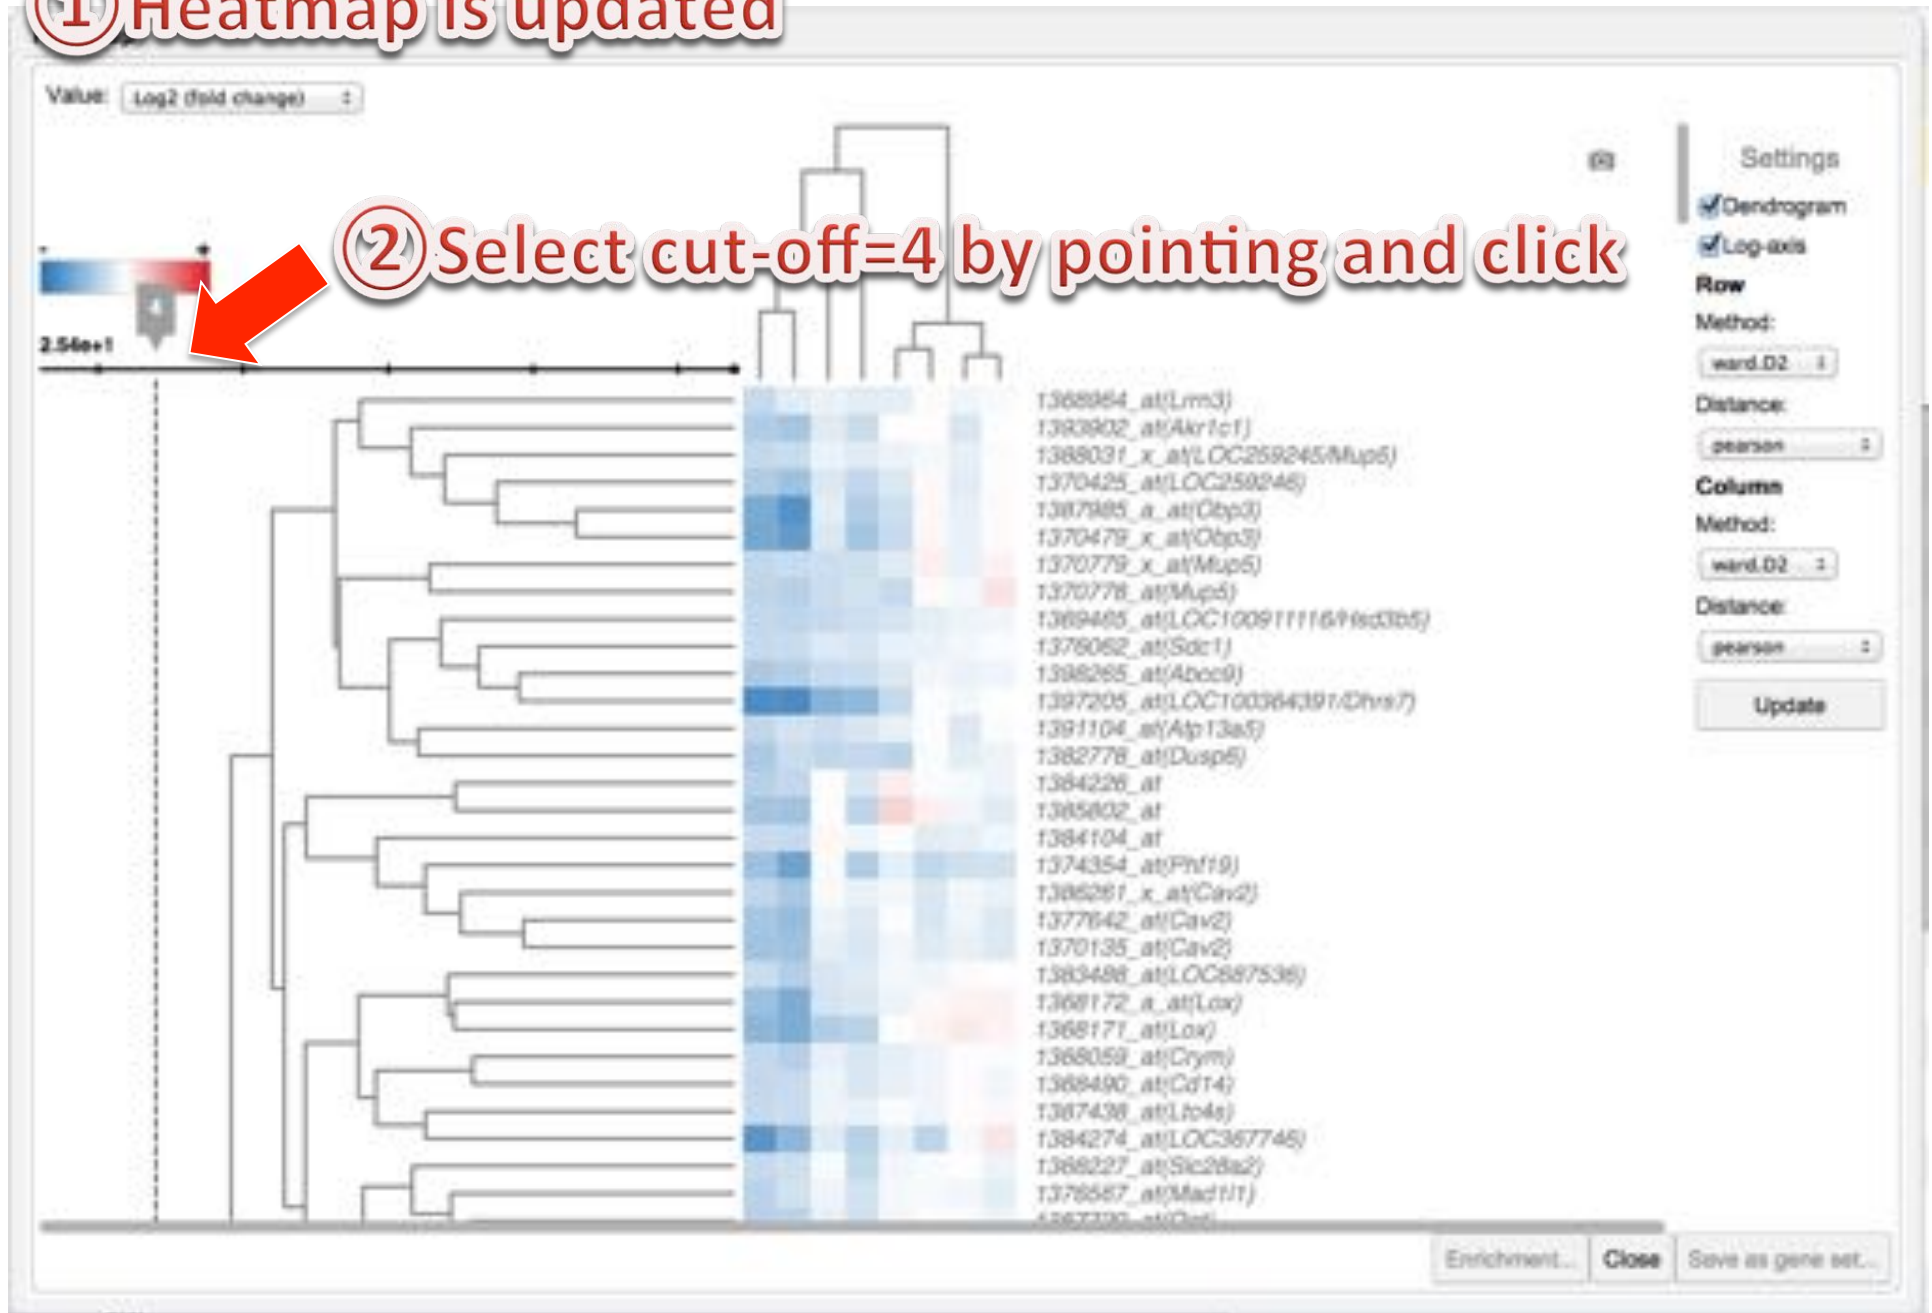

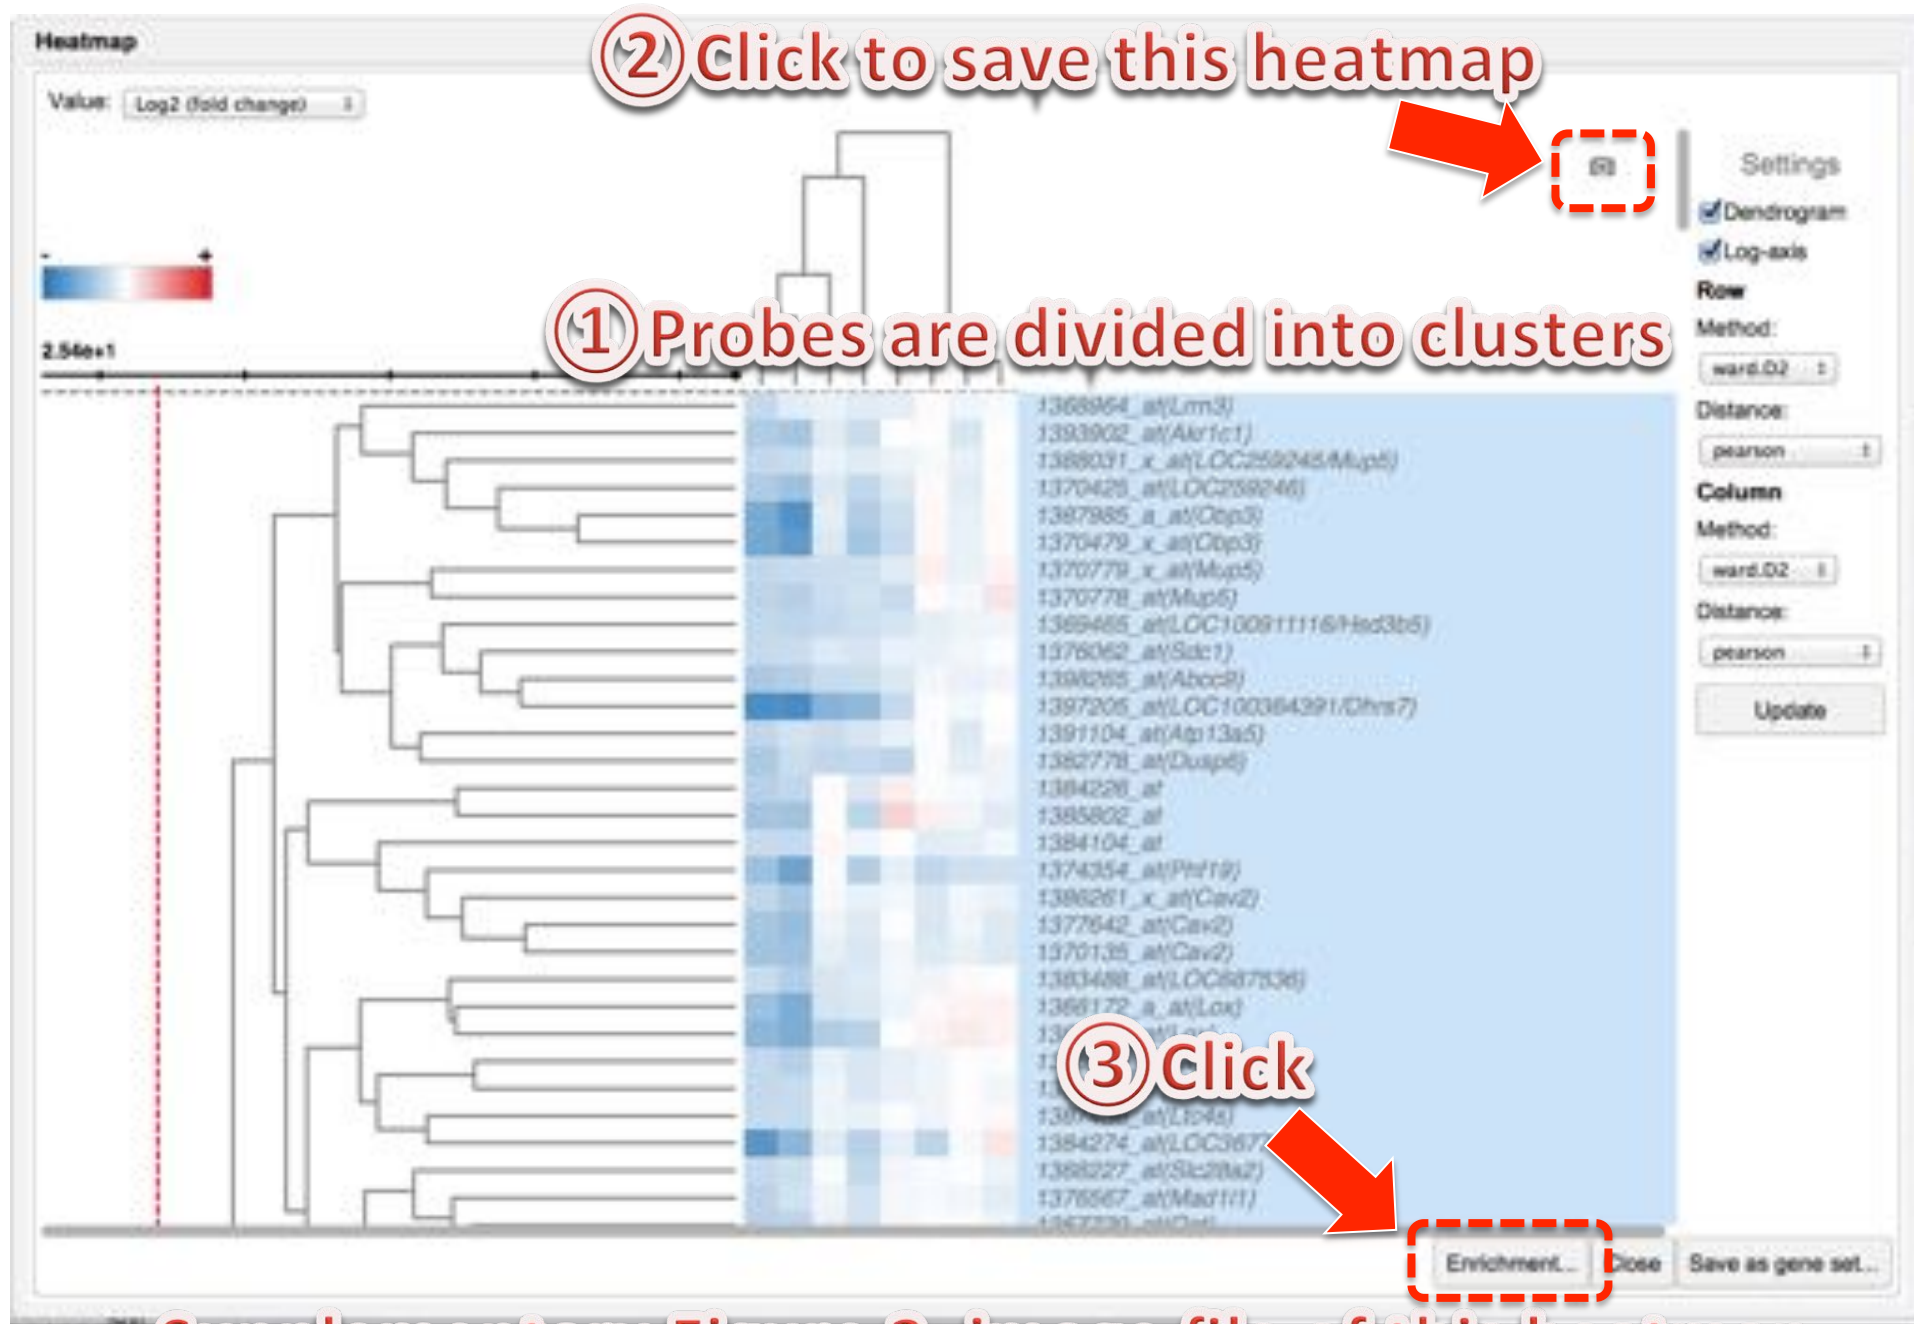

Supplementary Figure 3: image file of this heatmap

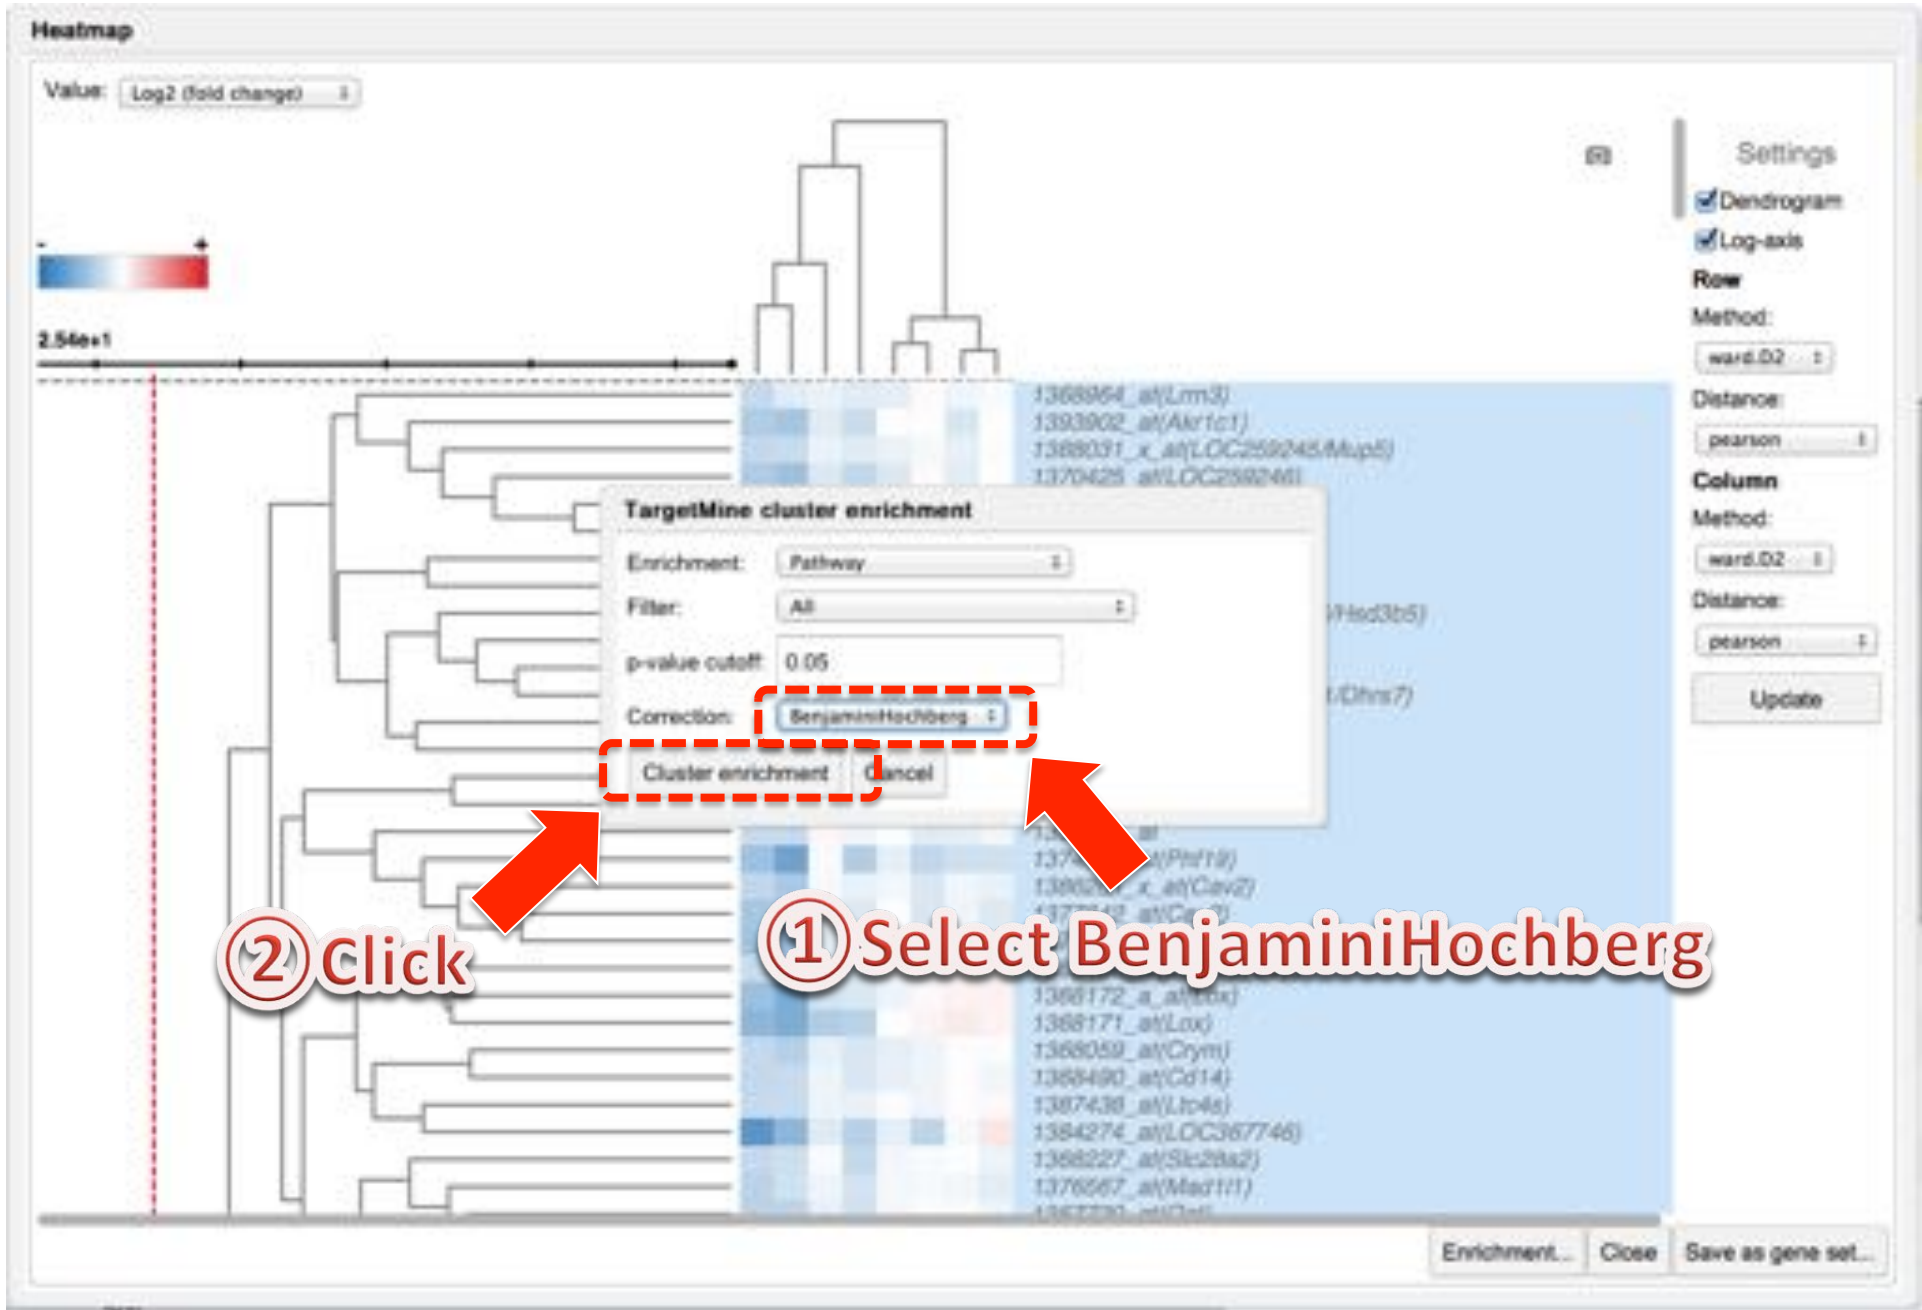

② Click

① Select BenjaminiHochberg

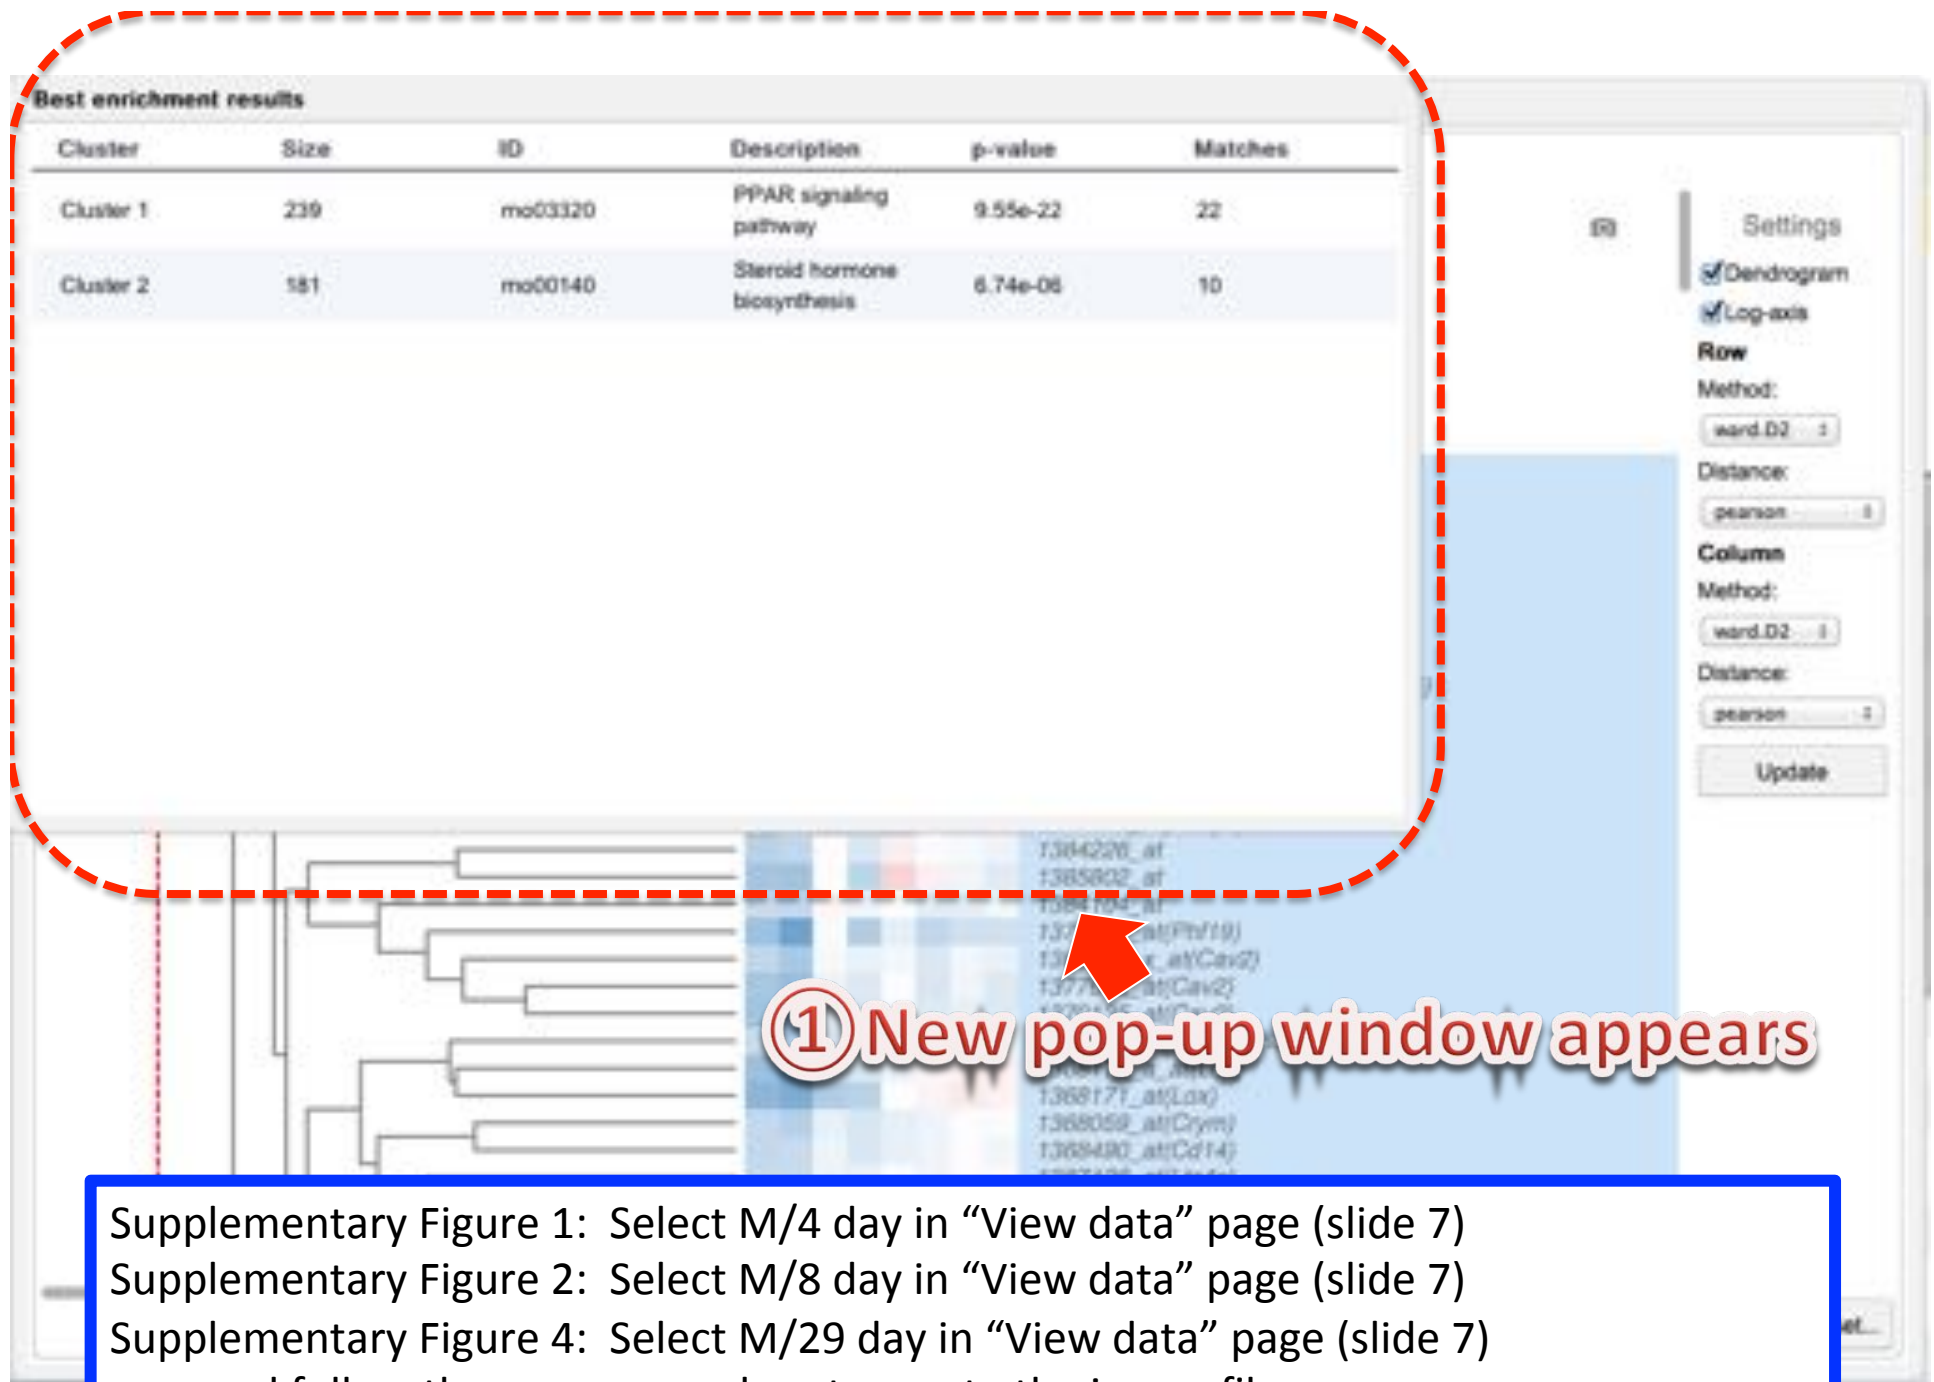



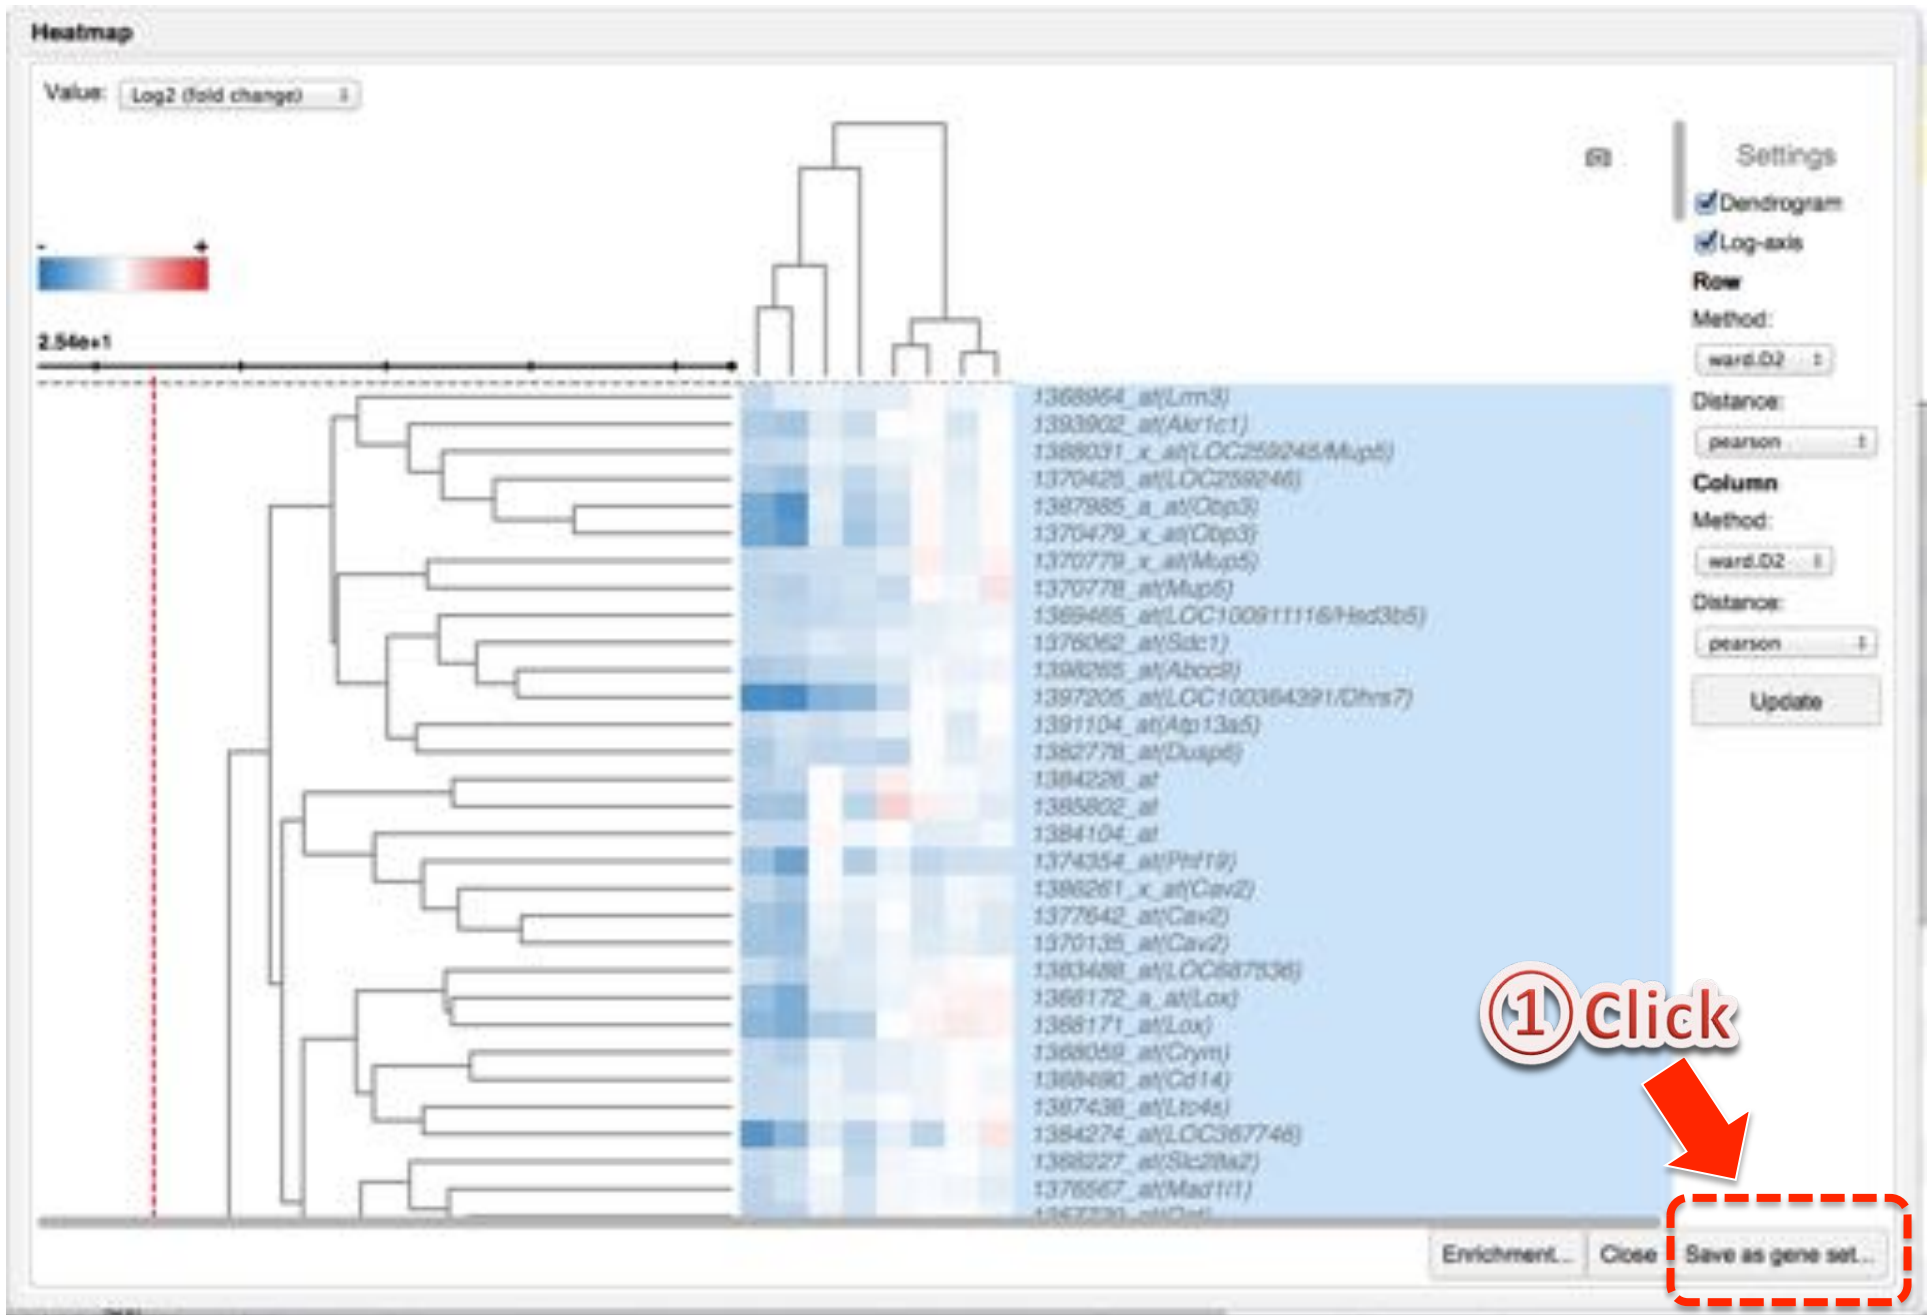

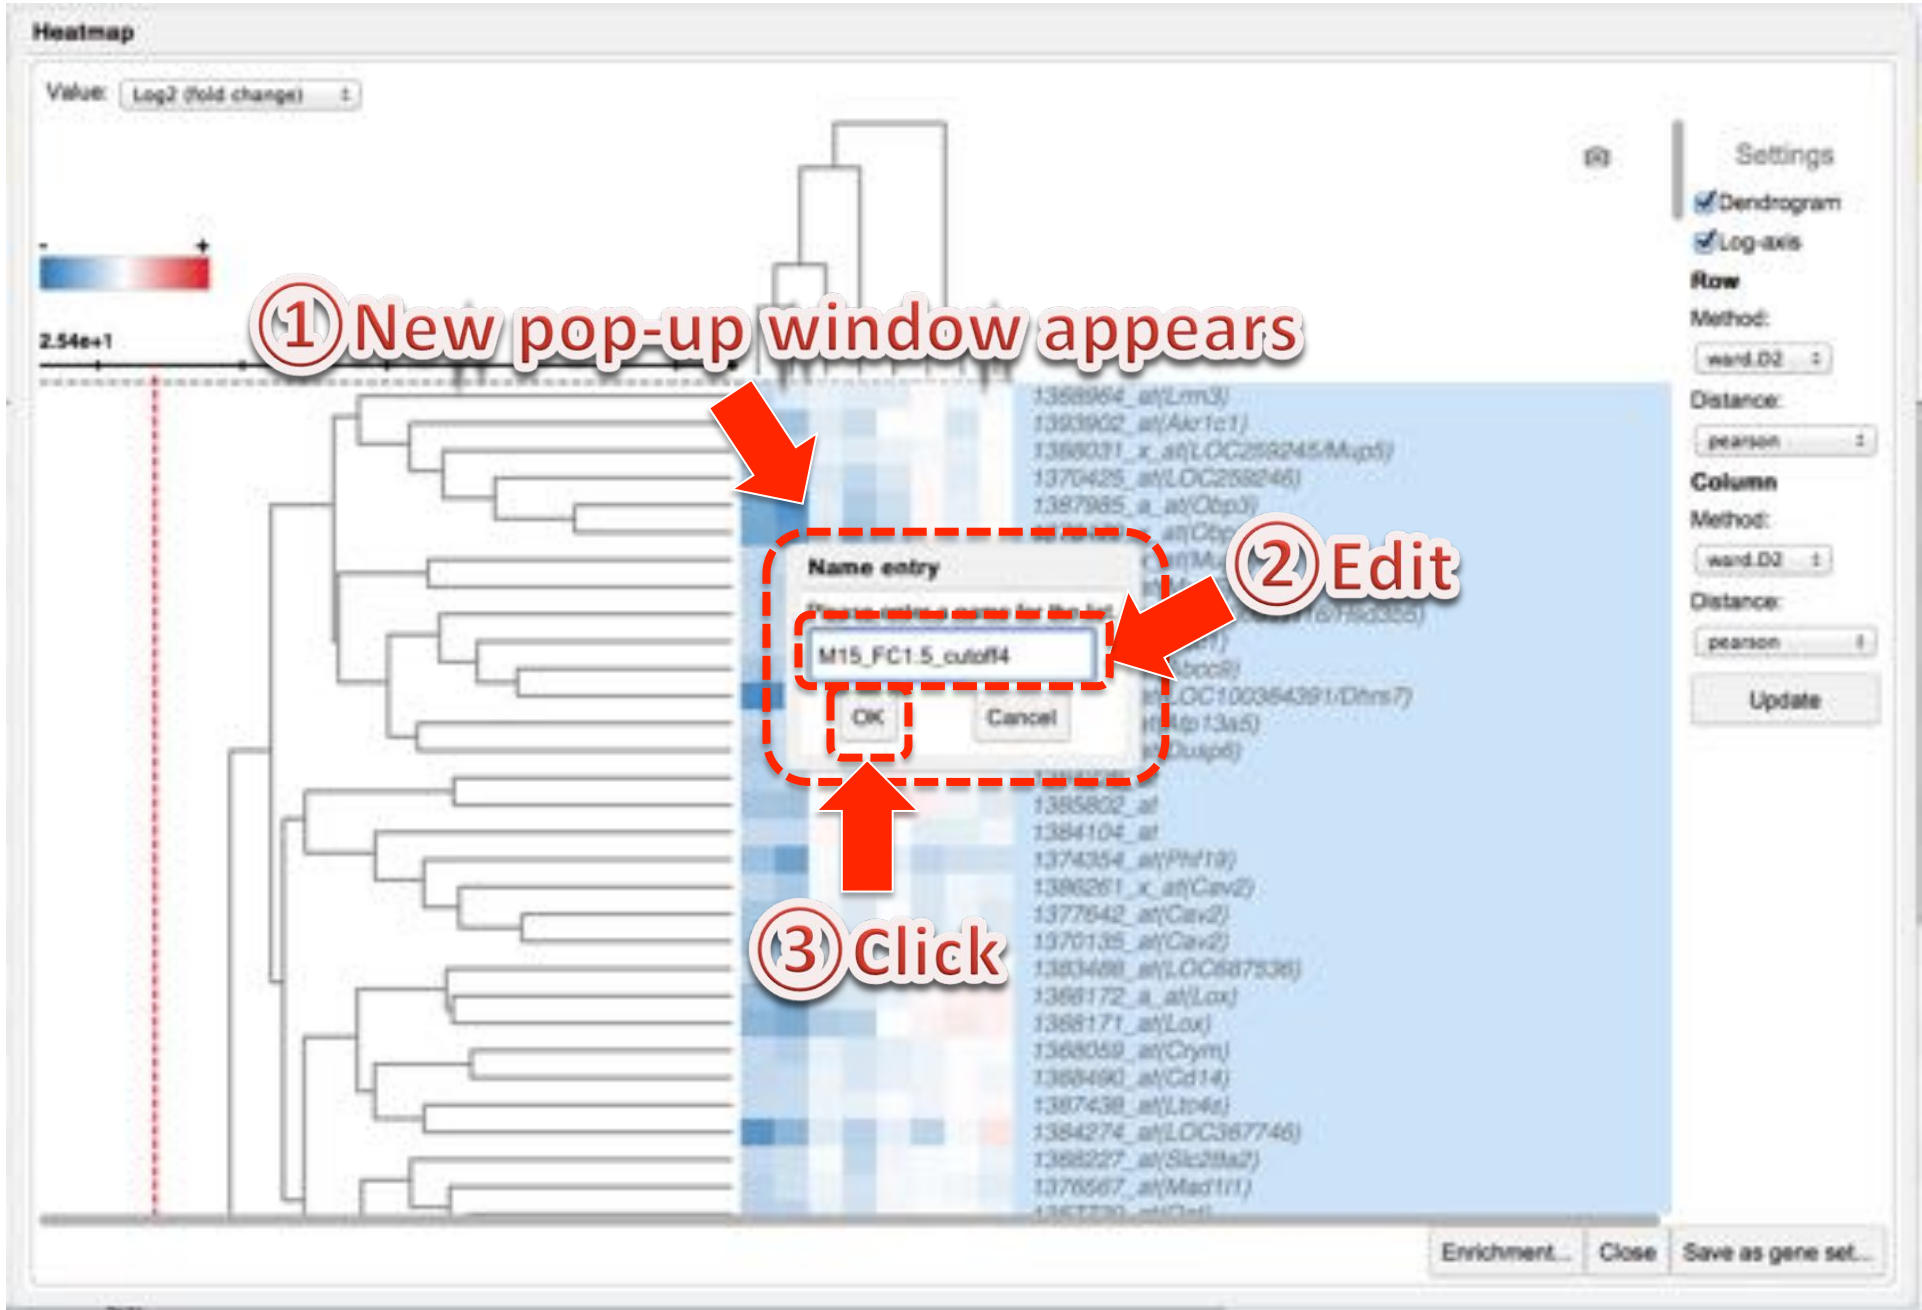

① New pop-up window appears

② Edit

③ Click

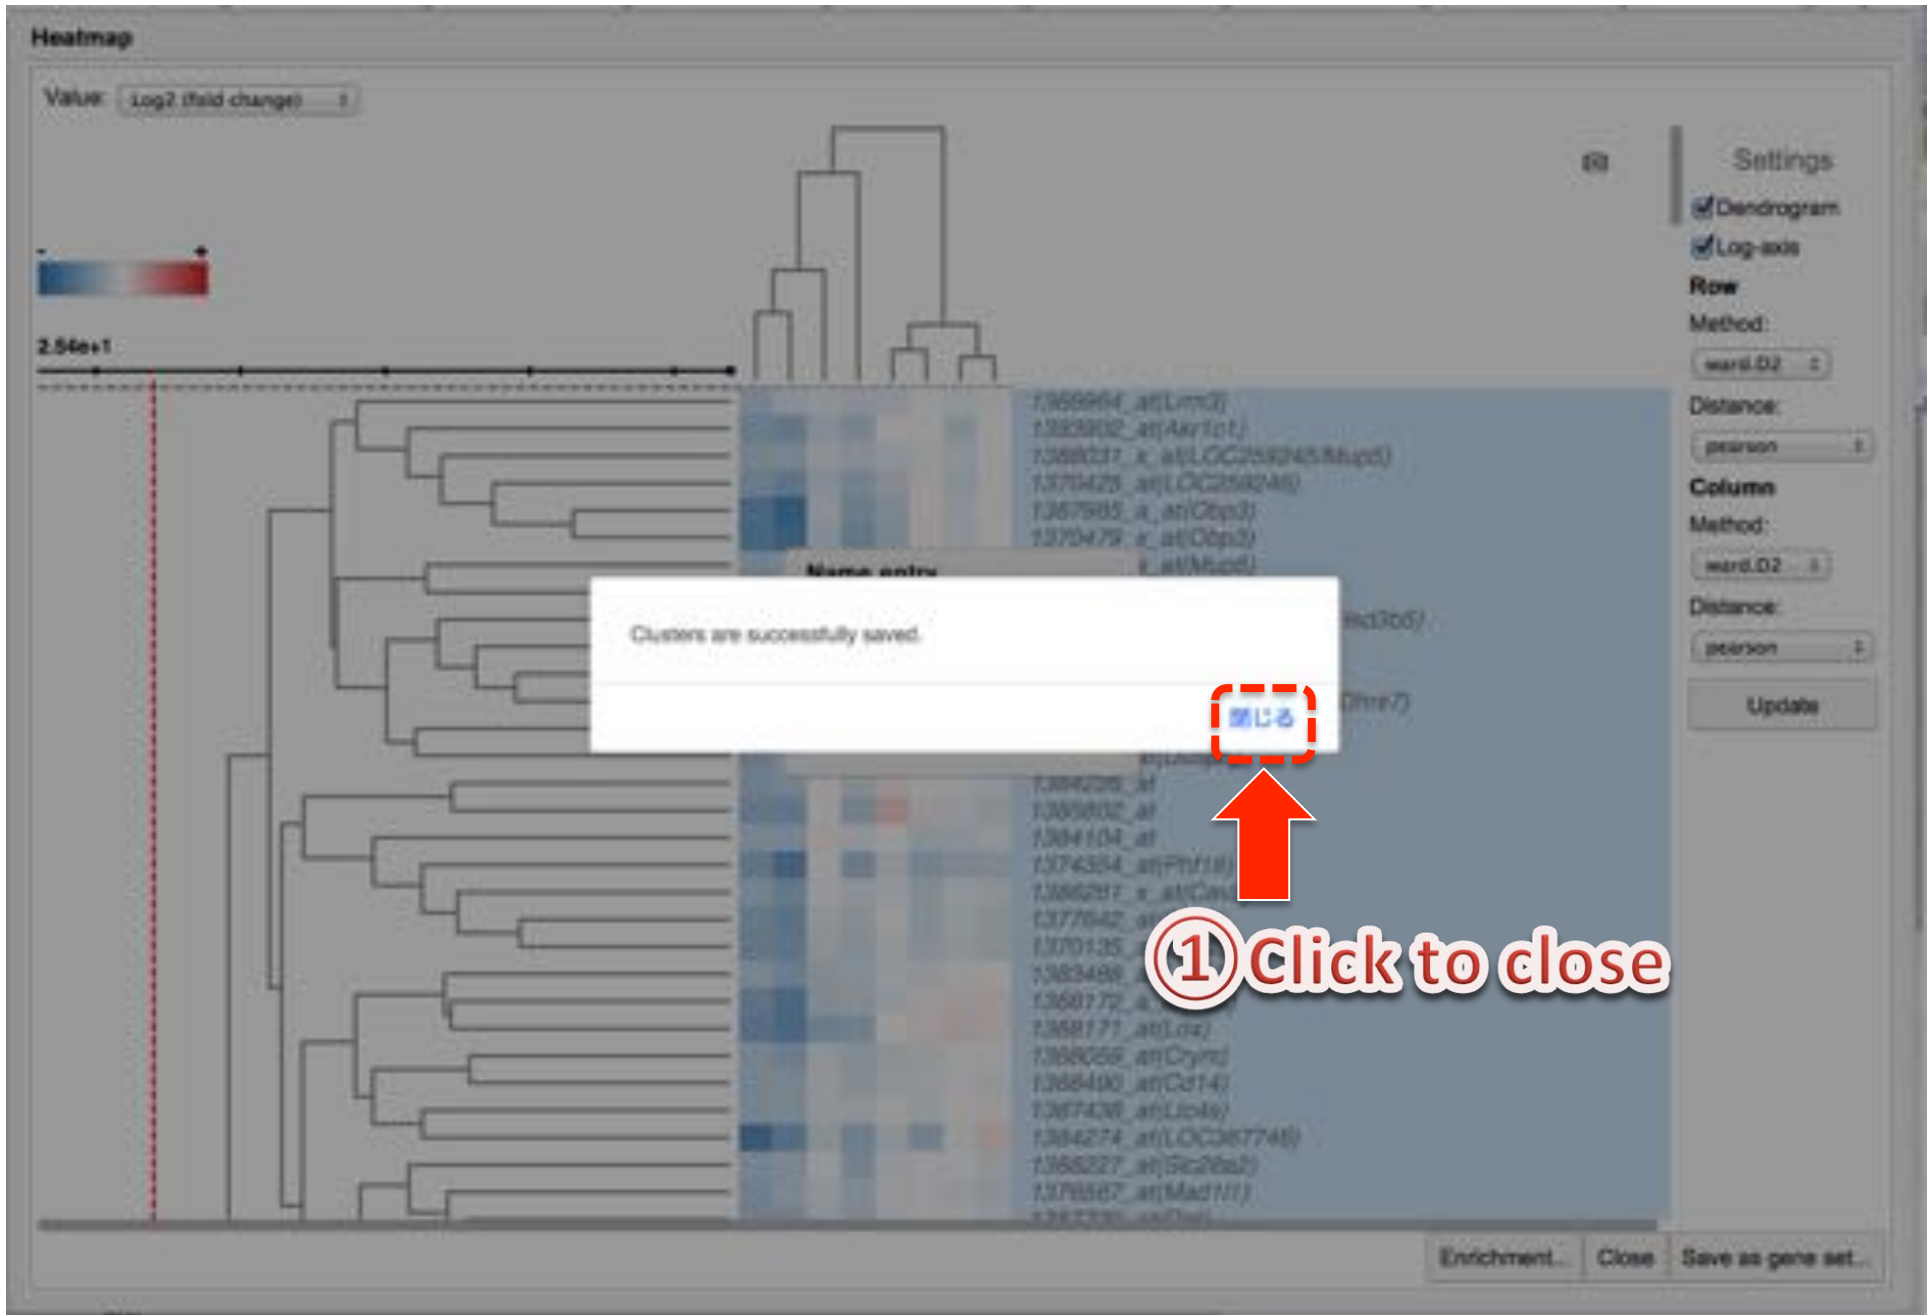

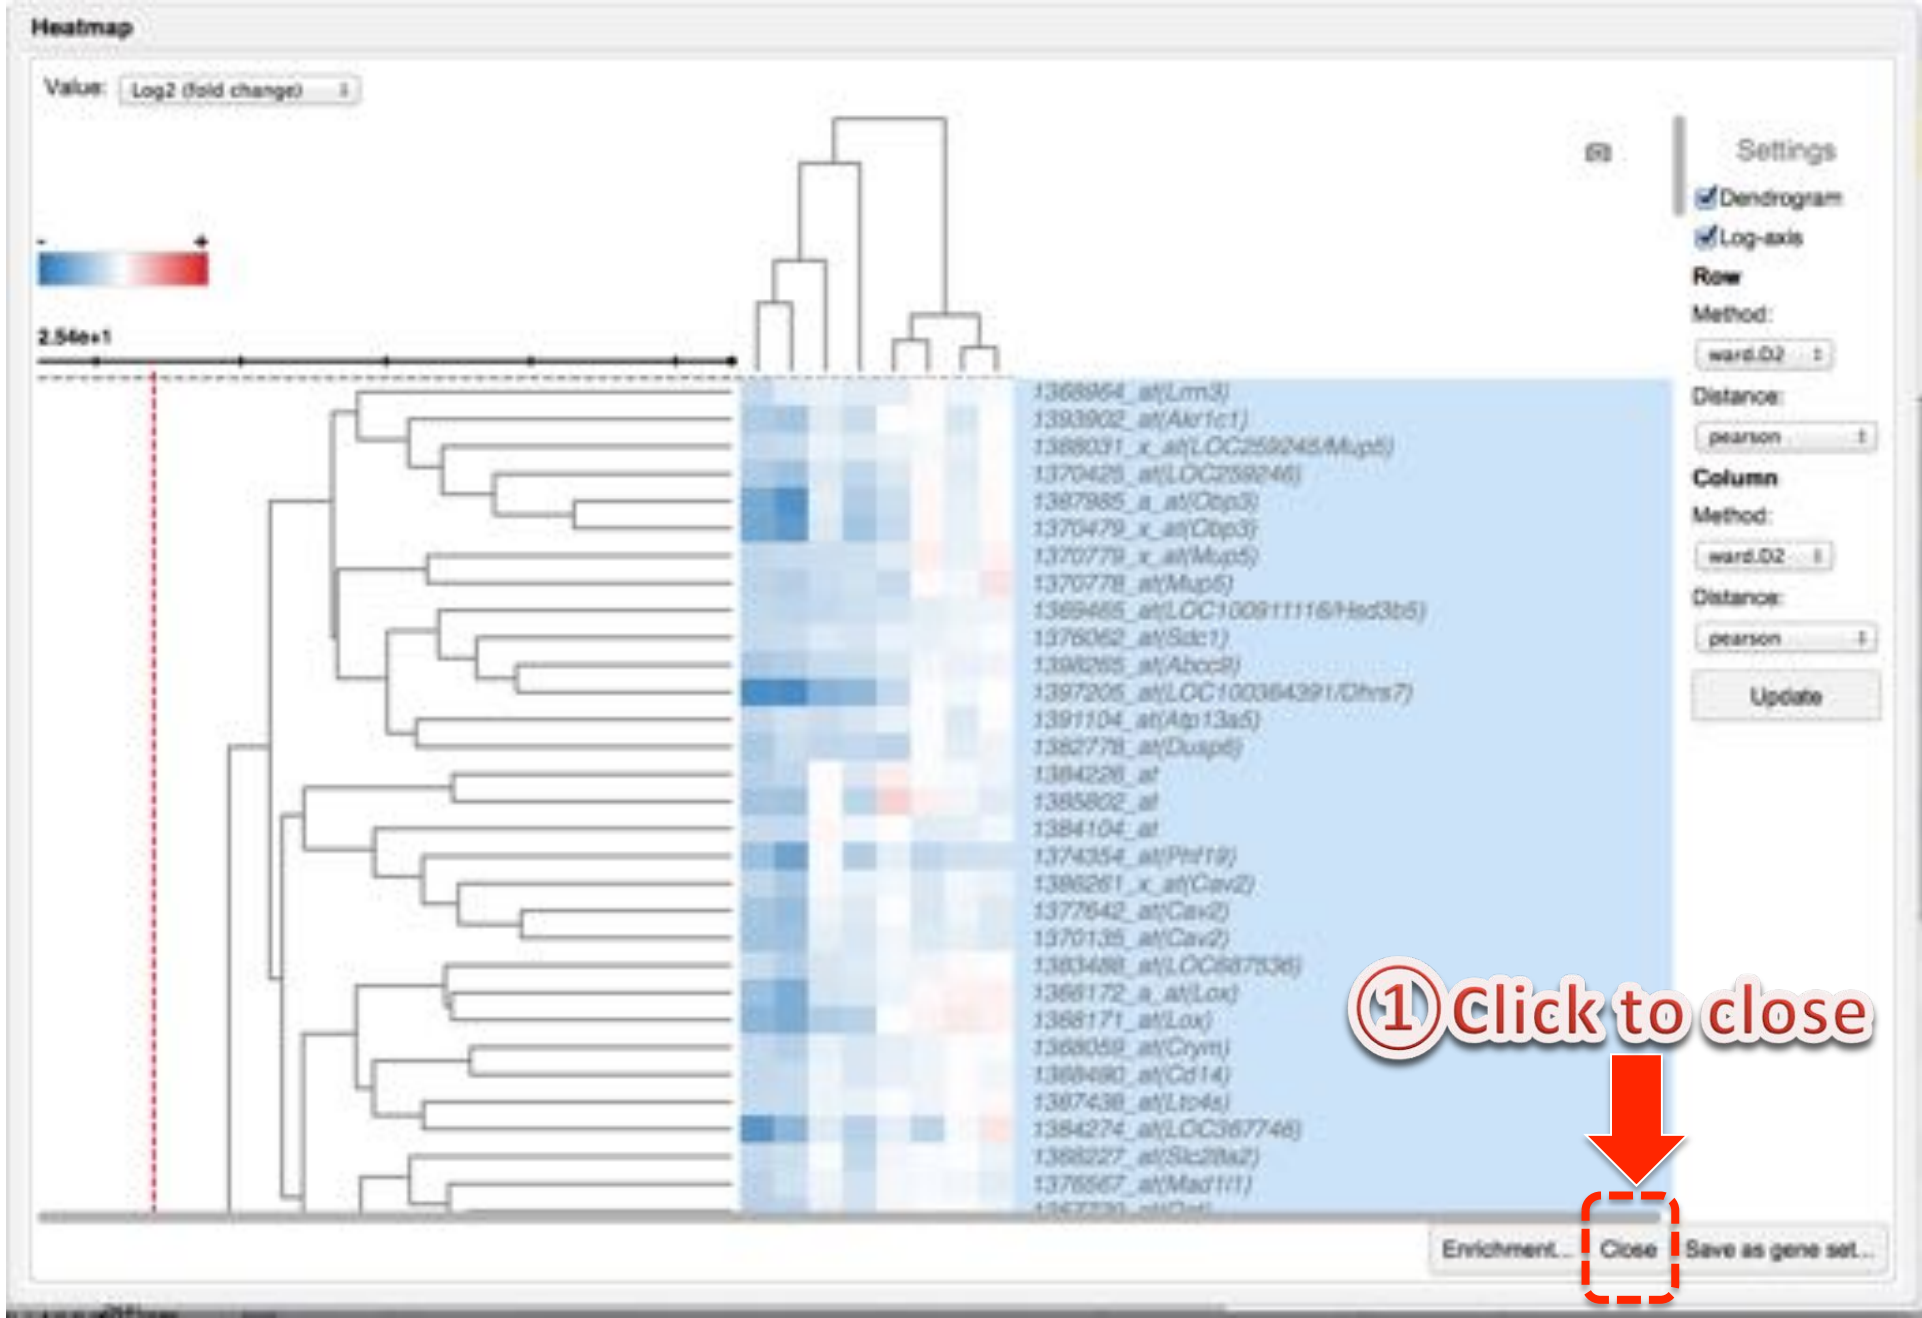

① Click

File Gene Sets View Tools Help / feedback

Start Sample groups View data Compound ranking Pathologies Sample details My data

Here you can inspect expression values for the sample groups you have defined. Click on column headers to sort data.

WY-14643\_M\_15day .WY-14643/Middle/15 day WY-14643\_M\_3hr .WY-14643/Middle/24 hr WY-14643\_M\_29day .WY-14643/Middle/29 day WY-14643\_M\_3hr .WY-14643/Middle/3 hr  
WY-14643\_M\_4day .WY-14643/Middle/4 day Show all

Log2 (fold change) 1-25 of 420 Show More p-value columns All Probes New Edit

| Gene Symbol         | Probe Title                                           | Probe        | WY-14643_M... | WY-14643_M... | WY-14643_M... | WY-14643_M... | WY-14643... |
|---------------------|-------------------------------------------------------|--------------|---------------|---------------|---------------|---------------|-------------|
| Acat1               | acyl-CoA thioesterase 1                               | 1398250_at   | 10.307        | 11.123        | 10.505        | 4.068         | 10.941      |
| Aqp3                | aquaporin 3                                           | 1387100_at   | 8.306         | (absent)      | 8.064         | (absent)      | 7.499       |
| LOC100911217        | adipogenin-like                                       | 1376298_at   | 8.15          | (absent)      | 8.052         | (absent)      | 5.391       |
|                     |                                                       | 1384474_at   | 7.818         | 4.972         | 6.932         | (absent)      | 6.184       |
| Chra2               | cholinergic receptor - nicotinic - alpha 2 (neuronal) | 1387574_at   | 7.573         | 2.529         | 6.721         | (absent)      | 3.357       |
| Hdc                 | histidine decarboxylase                               | 1370491_a_at | 7.257         | 8.121         | 7.365         | (absent)      | 7.247       |
| Fabp3               | fatty acid binding protein 3 - muscle and heart       | 1367660_at   | 6.833         | 2.382         | 6.71          | (absent)      | 6.627       |
| RGD1305928          | hypothetical LOC300207                                | 1380536_at   | 6.815         | 8.226         | 6.9           | (absent)      | 5.858       |
| Acat1<br>Acat2      | acyl-CoA thioesterase 1                               | 1388211_a_at | 6.489         | 5.262         | 6.167         | 2.2           | 6.76        |
| Fbp2                | fructose-1,6-bisphosphatase 2                         | 1368622_at   | 6.078         | 3.951         | 5.798         | (absent)      | 4.471       |
| Abhd3               | abhydrolase domain containing 3                       | 1382137_at   | 5.922         | 1.298         | 4.042         | (absent)      | 5.105       |
|                     |                                                       | 1383757_at   | 5.757         | (absent)      | 5.389         | (absent)      | (absent)    |
| Cpt1b               | camitine palmitoyltransferase 1b - muscle             | 1367742_at   | 5.648         | 2.853         | 5.414         | (absent)      | 5.372       |
| Aqp7                | aquaporin 7                                           | 1388317_at   | 5.638         | 1.64          | 4.667         | (absent)      | 4.852       |
| Spink3              | serine peptidase inhibitor - Kazal type 3             | 1368447_x_at | 5.097         | 1.887         | 4.123         | 0.076         | 1.297       |
| LOC100912489<br>Scd | acyl-CoA desaturase 2-like                            | 1367668_a_at | 4.986         | 0.036         | 6.298         | -0.322        | 0.636       |

File Gene Sets View Tools Help / feedback

Start Show all **data** Compound ranking Pathologies Sample details My data

Here you can view and filter data for the sample groups you have defined. Click on column headers to sort data.

WY-1463 Add new WY-14643\_M\_24hr WY-14643/Middle24 hr WY-14643\_M\_29day WY-14643/Middle29 day WY-14643\_M\_3hr WY-14643/Middle3 hr

WY-1463 Challenge event M4 day Show all

M15\_FC1.5\_cutoff4

log2 (FC) Add new M15\_FC1.5\_cutoff4 1

gene symbol probe M15\_FC1.5\_cutoff4

Probe WY-14643\_M... WY-14643\_M... WY-14643\_M... WY-14643\_M...

| gene symbol          | probe                                                 | M15_FC1.5_cutoff4 | Probe        | WY-14643_M... | WY-14643_M... | WY-14643_M... | WY-14643_M... |
|----------------------|-------------------------------------------------------|-------------------|--------------|---------------|---------------|---------------|---------------|
| Acot1                | acyl-CoA thioesterase 1                               | Delete            | 1386250_at   | 10.307        | 11.123        | 10.505        | 4.008         |
| Aqp3                 | aquaporin 3                                           |                   | 1387100_at   | 8.366         | (absent)      | 6.064         | (absent)      |
| LOC100911217         | adipogenin-like                                       |                   | 1376296_at   | 6.15          | (absent)      | 6.052         | (absent)      |
|                      |                                                       |                   | 1384474_at   | 7.818         | 4.972         | 6.932         | (absent)      |
| Chma2                | cholinergic receptor - nicotinic - alpha 2 (neuronal) |                   | 1387574_at   | 7.573         | 2.529         | 6.721         | (absent)      |
| Hdc                  | histidine decarboxylase                               |                   | 1370491_a_at | 7.257         | 5.121         | 7.385         | (absent)      |
| Fatp3                | fatty acid binding protein 3 - muscle and heart       |                   | 1367660_at   | 6.833         | 2.382         | 6.71          | (absent)      |
| RGD1305928           | hypothetical LOC300207                                |                   | 1380536_at   | 6.615         | 3.226         | 6.9           | (absent)      |
| Acot1<br>Acot2       | acyl-CoA thioesterase 1                               |                   | 1388211_s_at | 6.489         | 5.952         | 6.167         | 2.2           |
| Fbp2                 | fructose-1,6-bisphosphatase 2                         |                   | 1368622_at   | 6.078         | 3.991         | 5.799         | (absent)      |
| Abhd3                | abhydrolase domain containing 3                       |                   | 1382137_at   | 5.922         | 1.266         | 4.042         | (absent)      |
|                      |                                                       |                   | 1383757_at   | 5.757         | (absent)      | 5.389         | (absent)      |
| Cpt1b                | carnitine palmitoyltransferase 1b - muscle            |                   | 1367742_at   | 5.648         | 2.953         | 5.414         | (absent)      |
| Aqp7                 | aquaporin 7                                           |                   | 1368317_at   | 5.636         | 1.84          | 4.667         | (absent)      |
| Spink3               | serine peptidase inhibitor - Kazal type 3             |                   | 1368447_x_at | 5.097         | 1.687         | 4.123         | 0.076         |
| LOC100912469<br>Sirt | acyl-CoA desaturase 2-like                            |                   | 1367668_a_at | -4.956        | 0.036         | 6.296         | -0.322        |

① Click

File Gene Sets View Tools Help / feedback

Start | Sample groups | **View data** | Compound ranking | Pathologies | Sample details | My data

Here you can inspect expression values for the sample groups you have defined. Click on column headers to sort data.

WY-14643\_M\_15day -WY-14643/Middle/15 day | WY-14643\_M\_24hr | WY-14643\_M\_29day | WY-14643\_M\_3hr | WY-14643/Middle/3 hr | WY-14643\_M\_4day -WY-14643/Middle/4 day | Show

Log2 (fold change) | 1-25 of 239 | Show More | p-value columns | M15\_FC1.5\_cutoff4 / M15\_FC1.5\_cutoff4 | New | Edit

| Gene Symbol          | Probe Title                                           | Probe        | WY-14643_M... | WY-14643_M... | WY-14643_M... | WY-14643_M... |
|----------------------|-------------------------------------------------------|--------------|---------------|---------------|---------------|---------------|
| Aco1                 | acyl-CoA thioesterase 1                               | 1386250_at   | 10.307        | 11.123        |               | 4.058         |
| Aqp3                 | aquaporin 3                                           | 1387100_at   | 6.366         | (absent)      |               | (absent)      |
| LOC100911217         | adipogenin-like                                       | 1376296_at   | 8.15          | (absent)      |               | (absent)      |
|                      |                                                       | 1384474_at   | 7.818         | 6.972         |               | (absent)      |
| Chrna2               | cholinergic receptor - nicotinic - alpha 2 (neuronal) | 1387574_at   | 7.573         | 2.529         | 6.721         | (absent)      |
| Hdc                  | histidine decarboxylase                               | 1370491_a_at | 7.257         | 5.121         | 7.385         | (absent)      |
| Fabp3                | fatty acid binding protein 3 - muscle and heart       | 1367660_at   | 6.833         | 2.382         | 6.71          | (absent)      |
| RGD1305928           | hypothetical LOC300207                                | 1380536_at   | 6.615         | 3.228         | 6.8           | (absent)      |
| Aco1<br>Aco2         | acyl-CoA thioesterase 1                               | 1386211_s_at | 6.489         | 5.952         | 6.167         | 2.2           |
| Fbp2                 | fructose-1,6-bisphosphatase 2                         | 1368622_at   | 6.078         | 3.901         | 5.799         | (absent)      |
| Abhd3                | abhydrolase domain containing 3                       | 1382137_at   | 5.922         | 1.266         | 4.042         | (absent)      |
|                      |                                                       | 1383757_at   | 5.757         | (absent)      | 5.389         | (absent)      |
| Cpt1b                | camitine palmitoyltransferase 1b - muscle             | 1367742_at   | 5.648         | 2.953         | 5.414         | (absent)      |
| Aqp7                 | aquaporin 7                                           | 1368317_at   | 5.638         | 1.64          | 4.607         | (absent)      |
| Spink3               | serine peptidase inhibitor - Kazal type 3             | 1368447_x_at | 5.097         | 1.687         | 4.123         | 0.076         |
| LOC100912489<br>Sirt | acyl-CoA desaturase 2-like                            | 1367668_a_at | -4.995        | 0.036         | 6.296         | -0.322        |

① 239 probes in cluster 1 are shown

② Click

① New pop-up window appears

② Edit

③ Click

④ Create a heatmap, group probes, and save all clusters for M/4,8,15,29day data

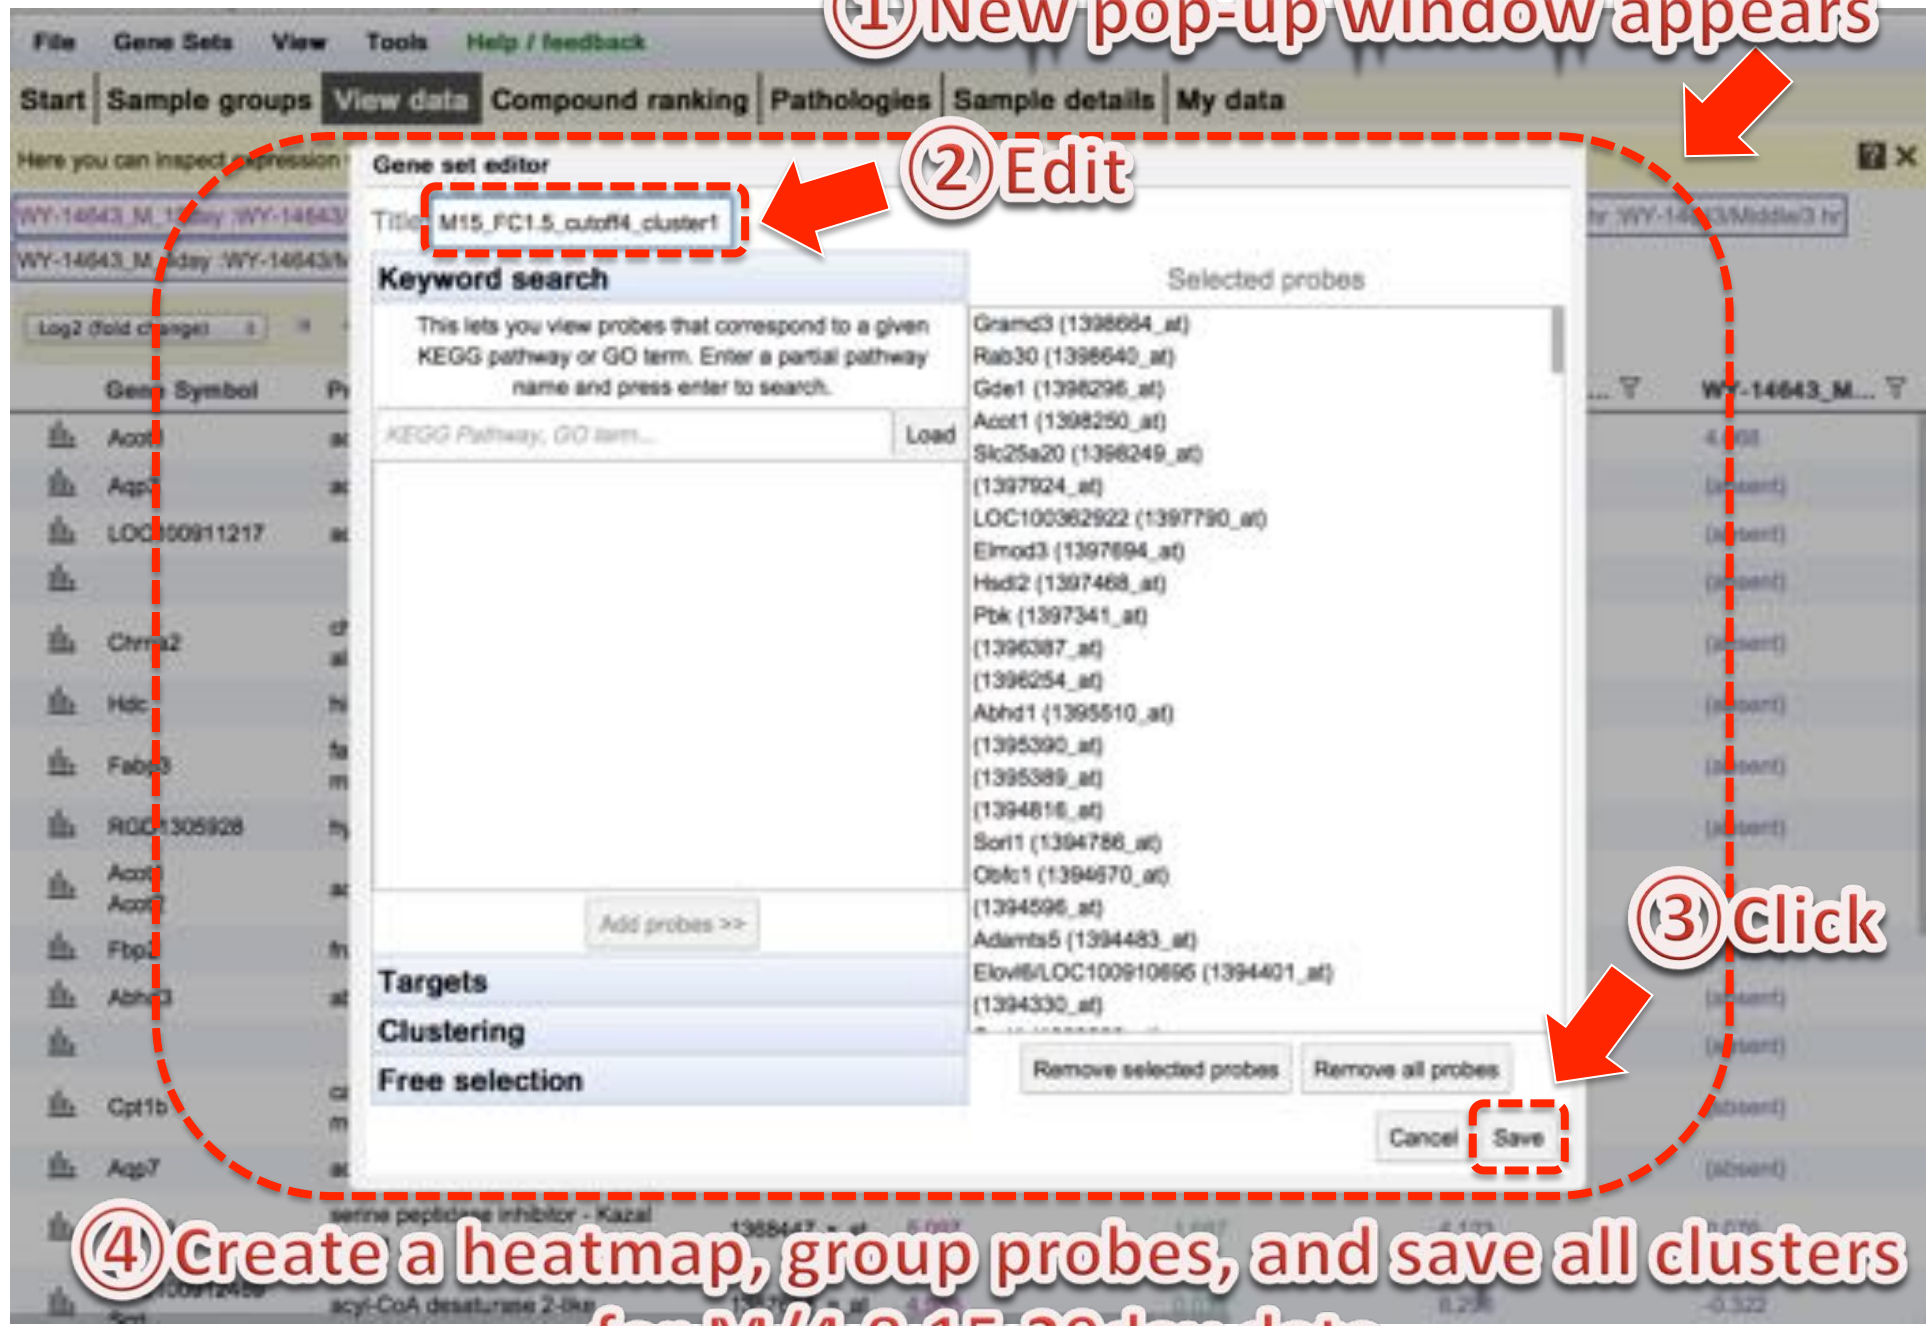



Here you can inspect expression values for the sample groups you have defined. Click on column headers to sort data. 

[WY-14643\\_M\\_15day -WY-14643/Middle/15 day](#) | 
 [WY-14643\\_M\\_24hr -WY-14643/Middle/24 hr](#) | 
 [WY-14643\\_M\\_29day -WY-14643/Middle/29 day](#) | 
 [WY-14643\\_M\\_3hr -WY-14643/Middle/3 hr](#)  
[WY-14643\\_M\\_4day -WY-14643/Middle/4 day](#) | [Show all](#)

Log2 (fold change) | 1-25 of 239 | Show More |  p-value columns | M15\_FC1.5\_cutoff4 / M15\_FC1.5\_cutoff4.1 | [New](#) | [Edit](#)

| Gene Symbol                                                                                              | Probe Title                                           | Probe        | WY-14643_M... | WY-14643_M... | WY-14643_M... | WY-14643_M... |
|----------------------------------------------------------------------------------------------------------|-------------------------------------------------------|--------------|---------------|---------------|---------------|---------------|
|  Aco1                   | acyl-CoA thioesterase 1                               | 1388250_at   | 10.307        | 11.123        | 10.605        | 4.058         |
|  Aqp3                   | aquaporin 3                                           | 1387100_at   | 6.366         | (absent)      | 6.064         | (absent)      |
|  LOC100911217           | adipogenin-like                                       | 1376296_at   | 8.15          | (absent)      | 6.052         | (absent)      |
|                         |                                                       | 1384474_at   | 7.818         | 4.972         | 6.932         | (absent)      |
|  Chra2                  | cholinergic receptor - nicotinic - alpha 2 (neuronal) | 1387574_at   | 7.573         | 2.529         | 6.721         | (absent)      |
|  Hdc                    | histidine decarboxylase                               | 1370491_a_at | 7.257         | 5.121         | 7.385         | (absent)      |
|  Fabp3                  | fatty acid binding protein 3 - muscle and heart       | 1367660_at   | 6.833         | 2.382         | 6.71          | (absent)      |
|  RGD1305928             | hypothetical LOC300207                                | 1380536_at   | 6.615         | 3.228         | 6.8           | (absent)      |
|  Aco1<br>Aco2           | acyl-CoA thioesterase 1                               | 1388211_s_at | 6.489         | 5.952         | 6.167         | 2.2           |
|  Fbp2                  | fructose-1 -6-bisphosphatase 2                        | 1368622_at   | 6.078         | 3.901         | 5.799         | (absent)      |
|  Abhd3                | abhydrolase domain containing 3                       | 1382137_at   | 5.922         | 1.266         | 4.042         | (absent)      |
|                       |                                                       | 1383757_at   | 5.757         | (absent)      | 5.389         | (absent)      |
|  Cpt1b                | camitine palmitoyltransferase 1b - muscle             | 1367742_at   | 5.648         | 2.953         | 5.414         | (absent)      |
|  Aqp7                 | aquaporin 7                                           | 1368317_at   | 5.638         | 1.64          | 4.607         | (absent)      |
|  Spink3               | serine peptidase inhibitor - Kazal type 3             | 1368447_x_at | 5.097         | 1.687         | 4.123         | 0.076         |
|  LOC100912489<br>Sert | acyl-CoA desaturase 2-like                            | 1367668_a_at | -4.995        | 0.036         | 6.296         | -0.322        |

File Gene Sets View Tools Help / feedback

Start Sample groups

TargetMine data  
 Compare two sample groups  
 Enrichment...  
 Show heat map  
 Go to TargetMine

Export gene sets to TargetMine... ← ① Click

WY-14643\_M\_15day :WY-14643/

WY-14643\_M\_4day :WY-14643/Middle/4 day Show all

log2 (fold change) 1-25 of 239 Show More p-value columns M15\_FC1.5\_cutoff4\_cluster1 New Edit

| Gene Symbol         | Probe Title                                           | Probe        | WY-14643_M... | WY-14643_M... | WY-14643_M... | WY-14643_M... |
|---------------------|-------------------------------------------------------|--------------|---------------|---------------|---------------|---------------|
| Acot1               | acyl-CoA thioesterase 1                               | 1366250_at   | 10.307        | 11.123        | 10.505        | 4.068         |
| Aqp3                | aquaporin 3                                           | 1387100_at   | 8.366         | (absent)      | 6.054         | (absent)      |
| LOC100911217        | adipogenin-like                                       | 1376296_at   | 8.15          | (absent)      | 6.052         | (absent)      |
|                     |                                                       | 1384474_at   | 7.818         | 4.972         | 6.932         | (absent)      |
| Chma2               | cholinergic receptor - nicotinic - alpha 2 (neuronal) | 1387574_at   | 7.573         | 2.529         | 6.721         | (absent)      |
| Hdc                 | histidine decarboxylase                               | 1370491_x_at | 7.257         | 5.121         | 7.385         | (absent)      |
| Fabp3               | fatty acid binding protein 3 - muscle and heart       | 1367660_at   | 6.833         | 2.382         | 6.71          | (absent)      |
| RGD1305928          | hypothetical LOC300207                                | 1380536_at   | 6.615         | 3.226         | 6.9           | (absent)      |
| Acot1<br>Acot2      | acyl-CoA thioesterase 1                               | 1388211_s_at | 6.489         | 5.952         | 6.167         | 2.2           |
| Fbp2                | fructose-1,6-bisphosphatase 2                         | 1368622_at   | 6.078         | 3.991         | 5.799         | (absent)      |
| Abhd3               | abhydrolase domain containing 3                       | 1382137_at   | 5.922         | 1.266         | 4.042         | (absent)      |
|                     |                                                       | 1383757_at   | 5.757         | (absent)      | 5.399         | (absent)      |
| Cpt1b               | carbonyl palmitoyltransferase 1b - muscle             | 1367742_at   | 5.648         | 2.953         | 5.414         | (absent)      |
| Aqp7                | aquaporin 7                                           | 1368317_at   | 5.638         | 1.64          | 4.667         | (absent)      |
| Spink3              | serine peptidase inhibitor - Kazal type 3             | 1368447_x_at | 5.097         | 1.687         | 4.123         | 0.076         |
| LOC100912489<br>Scp | acyl-CoA desaturase 2-like                            | 1367668_a_at | 4.956         | 0.036         | 6.296         | -0.322        |

File Gene Sets View Tools Help / feedback

Start | Sample groups | **View data** | Compound ranking | Pathologies | Sample details | My data

Here you can inspect expression values for the sample groups you have defined. Click on column headers to sort data.

WY-14643\_M\_15day :WY-14643/Middle/15 day | WY-14643\_M\_24hr :WY-14643/Middle/24 hr | WY-14643\_M\_29day :WY-14643/Middle/29 day | WY-14643\_M\_3hr :WY-14643/Middle/3 hr  
 WY-14643\_M\_4day :WY-14643/Middle/4 day | Show all

log2 (fold change) | 1-25 of 239 | Show More |  p-value columns | M15\_FC1.5\_outoff4\_cluster1 | New | Edit

| Gene Symbol  | Probe Title                                         | Probe        | WY-14643_M... | WY-14643_M... | WY-14643_M... | WY-14643_M... |
|--------------|-----------------------------------------------------|--------------|---------------|---------------|---------------|---------------|
| Acof1        | acyl-CoA thioesterase 1                             | 1398250_at   | 10.307        | 11.123        | 10.505        | 4.038         |
| Aqp3         | aquaporin 3                                         |              |               |               | 6.064         | (absent)      |
| LOC100911217 | adipogenin-like                                     |              |               |               | 6.052         | (absent)      |
|              |                                                     |              |               |               | 6.932         | (absent)      |
| Chra2        | cholinergic receptor - nicotinic alpha 2 (neuronal) |              |               |               | 6.77          | (absent)      |
| Hdc          | histidine decarboxylase                             |              |               |               | 7.3           | (absent)      |
| Fabp3        | fatty acid binding protein 3 muscle and heart       |              |               |               | 6.71          | (absent)      |
| RGD1305928   | hypothetical LOC305928                              |              |               |               | 6.9           | (absent)      |
| Acof1        | acyl-CoA thioesterase 1                             | 1398250_at   | 6.5           | 6.5           | 6.167         | 2.2           |
| Acof2        | acyl-CoA thioesterase 2                             | 1398251_at   | 6.5           | 6.5           | 6.167         | 2.2           |
| Fbp2         | fructose-1,6-bisphosphatase 2                       | 1368622_at   | 6.7           | 3.901         | 5.799         | (absent)      |
| Abhd3        | abhydrolase domain containing 3                     | 1382137_at   | 6.9           | 1.266         | 4.042         | (absent)      |
|              |                                                     | 1383757_at   | 5.75          | (absent)      | 5.389         | (absent)      |
| Cpt1b        | carntine palmitoyl transferase 1b muscle            |              |               |               |               | (absent)      |
| Aqp7         | aquaporin 7                                         | 1368317_at   | 6.638         | 6.04          | 4.867         | (absent)      |
|              | serine peptidase inhibitor - Kazal type 3           | 1368447_x_at | 6.097         | 1.037         | 4.123         | 0.076         |
| LOC100912459 | acyl-CoA dehydrogenase 2-like                       | 1367905_at   | 4.995         | 0.034         | 6.726         | -0.322        |

**TargetMine export details**

You must have a TargetMine account in order to use this function. If you do not have one, you may create one at <http://targetmine.mizuguchi-lab.org>.

Account name (e-mail address)

Password

Replace lists with identical names

① New pop-up window appears

② Input your account

③ Click

**NOTE:**

Users need to create TargetMine account in advance.

Here you can inspect expression values for the sample groups you have defined. Click on column headers to sort data.

WY-14643\_M\_15day :WY-14643/Middle/15 day | WY-14643\_M\_24day :WY-14643/Middle/24 day | WY-14643\_M\_29day :WY-14643/Middle/29 day | WY-14643\_M\_30r :WY-14643/Middle/30 r  
WY-14643\_M\_4day :WY-14643/Middle/4 day | Show all

Log2 (fold change) | 1-25 of 239 | Show More | p-value column: M15\_FC1.5\_cutoff4\_cluster1 | New | Edit

| Gene Symbol  | Probe Title                                         | Probe        | WY-14643_M... | WY-14643_M... | WY-14643_M... | WY-14643_M... |
|--------------|-----------------------------------------------------|--------------|---------------|---------------|---------------|---------------|
| Acat1        | acyl-CoA thioesterase 1                             | 1368250_at   | 10.307        | 11.123        | 10.505        | -4.068        |
| Acp3         | aquaporin 3                                         | 1367100_at   | 6.366         | (absent)      | 6.064         | (absent)      |
| LOC100911217 | adipogenin-like                                     | 1376296_at   | 6.15          | (absent)      | 6.052         | (absent)      |
|              |                                                     |              |               |               | 6.932         | (absent)      |
| Chma2        | cholinergic receptor - nicotinic alpha 2 (neuronal) |              |               |               | 6.721         | (absent)      |
| Hdc          | histidine decarboxylase                             |              |               |               | 7.388         | (absent)      |
| Fatp3        | fatty acid binding protein 3 muscle and heart       | 1367660_at   | 6.833         | 2.362         | 6.71          | (absent)      |
| RGD1306928   | hypothetical LOC300207                              | 1360536_at   | 6.616         | 3.238         | 6.9           | (absent)      |
| Acat1        | acyl-CoA thioesterase 1                             | 1368211_s_at | 6.489         | 1.952         | 6.167         | 2.2           |
| Acat2        |                                                     |              |               |               |               |               |
| Fbp2         | fructose-1,6-bisphosphatase 2                       | 1368622_at   | 6.078         |               |               | (absent)      |
| Abhd3        | abhydrolase domain containing 3                     | 1362137_at   | 5.922         |               | 4.042         | (absent)      |
|              |                                                     | 1363757_at   | 5.757         | (absent)      | 3.388         | (absent)      |
| Cpt1b        | camitine palmitoyltransferase 1b - muscle           | 1367742_at   | 5.648         | 2.853         | 5.414         | (absent)      |
| Acp7         | aquaporin 7                                         | 1368317_at   | 5.638         | 1.4           | 4.667         | (absent)      |
| Spink3       | serine peptidase inhibitor - Kazal type 3           | 1368447_x_at | 5.097         | 1.667         | 4.123         | 0.076         |
| LOC100912469 | acyl-CoA desaturase 2-like                          | 1367668_s_at | 4.985         | 5.336         | 6.296         | -0.322        |

The lists were successfully exported.

閉じる

① Click to close

① Open TargetMine (targetmine.mizuguchilab.org)

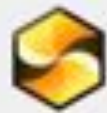

TargetMine

[Terms of use](#) [Citation](#) [The Mizuguchi Laboratory](#) [NIBIO/IN](#)

[Home](#) [Overview](#) [News](#) [Tutorials](#) [Documentation](#) [Download](#)

# TargetMine

Data warehouse for drug discovery

The use of TargetMine web-based tools and web services is free to **ALL** users, subject to [terms of use](#).

TargetMine Auxiliary Toolkit

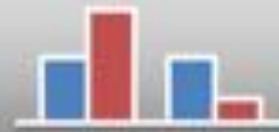

Enrichment analysis<sup>†</sup>

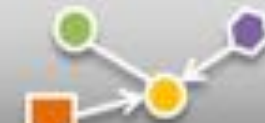

Composite network

[More info...](#)

Start using TargetMine

① Click

## What's new

- [TargetMine update](#) 2017/01/30
- [TargetMine update](#) 2016/12/19

## Tutorial Movies

- Tutorial movies for TargetMine (English)
- [Keyword, Template Search](#)

## Take a tour!

Have no idea what is TargetMine and what can be done with TargetMine? Start from

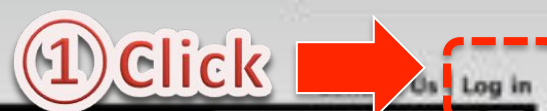

### Search

Search TargetMine. Enter names, identifiers or keywords for genes, proteins, pathways, ontology terms, etc. (e.g. TNF, ADH1A\_HUMAN, glucokinase, Alzheimer).

e.g. STAT1, TP53

**SEARCH**

### List Upload

Enter a list of identifiers.

Gene

e.g. 1080, 125, 217, 2944, 2947, 2950, 2952, 3105, 3106, 3107, 3115, 3119, 3123, 3265, 3304, 3458, 3586, 3836, 4257, 5444, 54576, 54577, 54578, 54638,

**ANALYSE**

### Welcome Back!

2015年4月1日より、ウェブ版のTargetMineは、アカデミック/非アカデミックを問わず、無料で利用可能になりました。

TargetMine integrates many types of data for human, rat and mouse. You can run flexible queries, export results and analyse lists of data.

**TUTORIALS**

TargetMine loads gene information from Entrez Gene. [Read more](#)

Query for genes:

- Gene → Pathway
- Gene(s) → Disease(s)
- Gene(s) → Compound(s)
- Gene(s) → Integrated Pathway clusters
- Disease Ontology (Name) → Genes
- Disease (DOI) → SNPs and Genes (GWAS)
- Gene list → Compounds that target hub or bottleneck genes
- Convert Gene → Orthologous Gene

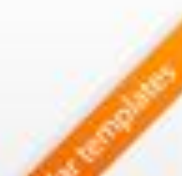

### Account

**Login using username (email) and password**

Username:

Password:

[Forgot password?](#)

**Create account ...**

- your  lists and  queries will be privately saved
- you can  favorite items
- you can share  lists with other users

[Create account now](#)

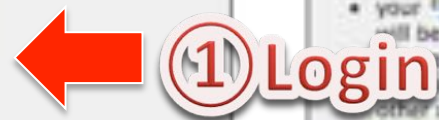

[Questions? Comments? Click here!](#)

TargetMine is developed by the  Mizuguchi Laboratory @  
 国立研究開発法人 医薬基盤・健康・栄養研究所  
National Institute of Biomedical Innovation, Health and Nutrition

Powered by  **InterMine** 1.6.8

Process to upgrade your lists has started. Go to MyMine->Lists page to verify the status of your lists. Hide

Logged in as user [redacted] Hide

### Search

Search TargetMine. Enter names, identifiers or keywords for genes, proteins, pathways, ontology terms, etc. (e.g. TNF, ADH1A\_HUMAN, glucokinase, Alzheimer ).

e.g. STAT1, TP53

**SEARCH**

### List Upload

Enter a list of identifiers.

Gene

e.g. 1080, 125, 217, 2944, 2947, 2950, 2952, 3105, 3106, 3107, 3115, 3116, 3123, 3265, 3304, 3458, 3586, 3856, 4257, 5444, 54576, 54577, 54578, 54658,

**ANALYSE**

### Welcome Back!

2015年4月1日より、ウェブ版の TargetMineは、アカデミック/非アカデミックを問わず、無料で利用可能になりました。

TargetMine integrates many types of data for human, rat and mouse. You can run flexible queries, export results and analyse lists of data.

**TUTORIALS**

- GENES
- PROTEINS
- DOMAIN
- STRUCTURE
- INTERACTIONS
- PATHWAYS
- COMPOUNDS

TargetMine loads gene information from Entrez Gene. [Read more](#)

Query for genes:

- Convert Gene ⇄ Orthologus Gene
- Disease (DO) ⇄ SNPs and Genes (GWAS)
- Disease Ontology (Name) ⇄ Genes
- Disease Ontology ID(s) ⇄ Genes

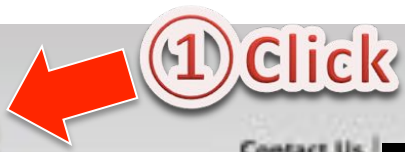



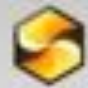

## Your Lists

| <input type="checkbox"/> | LIST NAME          | DESCRIPTION                         | TYPE | NUMBER OF OBJECTS | DATE CREATED |
|--------------------------|--------------------|-------------------------------------|------|-------------------|--------------|
| <input type="checkbox"/> |                    |                                     |      |                   |              |
| <input type="checkbox"/> | M15_FC1.5_cluster1 | Created with Java Webservice-Client | Gene | 180 values        | [Redacted]   |
| <input type="checkbox"/> |                    |                                     |      |                   |              |
| <input type="checkbox"/> |                    |                                     |      |                   |              |
| <input type="checkbox"/> |                    |                                     |      |                   |              |
| <input type="checkbox"/> |                    |                                     |      |                   |              |
| <input type="checkbox"/> |                    |                                     |      |                   |              |
| <input type="checkbox"/> |                    |                                     |      |                   |              |
| <input type="checkbox"/> |                    |                                     |      |                   |              |

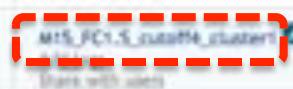

← ① Click

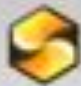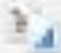

## List Analysis for M15\_FC1.5\_cutoff4\_cluster1 (180 Genes)

Manage Columns

Manage Filters

Manage Relationships

Generate Python code

Export

Save as List

Rows per page: 25

Navigation: < << >> >

page 1

Showing rows 1 to 25 of 180

| Gene DB identifier | Gene Symbol  | Gene Name                                 | Gene Organism Name |
|--------------------|--------------|-------------------------------------------|--------------------|
| 100360507          | LOC100360507 | inducible carbonyl reductase-like         | Rattus norvegicus  |
| 100362922          | LOC100362922 | rCG41077-like                             | Rattus norvegicus  |
| 100365047          | LOC100365047 | scavenger receptor class B, member 2-like | Rattus norvegicus  |
| 100910040          | LOC100910040 | liver carboxylesterase-like               | Rattus norvegicus  |

Convert to a different type

Protein: 185

Orthologues

H. sapiens (144) M. musculus (149)

Auxiliary Toolkit

Enrichment+

Composite Interaction Network

① Scroll down

# NOTE:

Since TargetMine updates monthly, the result can be slightly different from that in Supplementary Table 2

Click to select widgets you would like to display:

- Pathway Enrichment
- Integrated Pathway Cluster Enrichment
- Gene Ontology Enrichment
- COSim Enrichment
- Disease Enrichment
- Disease Ontology Enrichment
- InterPro domain Enrichment
- CATH classification Enrichment
- Compound Enrichment
- Tissue Enrichment

### Pathway Enrichment

Pathways enriched for genes in this list - data from KEGG, Reactome and NCI

Number of Genes in this list not analysed in this widget: 61

Test Correction:  Max p-value:  DataSet:

Background population:

| <input type="checkbox"/> Pathways                                             | p-Value      | Matches |
|-------------------------------------------------------------------------------|--------------|---------|
| <input type="checkbox"/> PPAR signaling pathway [ko03320]                     | 9.52407e-22  | 22      |
| <input type="checkbox"/> Metabolism of lipids and lipoproteins [R-FOO-556833] | 2.648616e-16 | 36      |
| <input type="checkbox"/> Fatty acid degradation [ko00071]                     | 3.654209e-14 | 14      |
| <input type="checkbox"/> Biosynthesis of unsaturated fatty acids [ko01040]    | 4.743065e-14 | 12      |
| <input type="checkbox"/> Fatty acid metabolism [ko01212]                      | 1.950866e-13 | 14      |
| <input type="checkbox"/> Meta                                                 |              |         |
| <input type="checkbox"/> Metabolic pathways [ko01100]                         | 8.567e-10    | 48      |

### Integrated Pathway Cluster Enrichment

Integrated Pathway Clusters(IPCs) enriched for genes in this list

Number of Genes in this list not analysed in this widget: 61

Test Correction:  Max p-value:  Background population:

| <input type="checkbox"/> IPCs                                                              | p-Value      | Matches |
|--------------------------------------------------------------------------------------------|--------------|---------|
| <input type="checkbox"/> Metabolism of lipids and lipoproteins [FOO5]                      | 6.589558e-33 | 53      |
| <input type="checkbox"/> Glycerophospholipid metabolism(Arachidonic acid metabolism [FO12] | 1.120517e-9  | 18      |
| <input type="checkbox"/> Biological oxidations(Chemical carcinogenesis [FOO6]              | 5.939390e-6  | 18      |
| <input type="checkbox"/> Carbon metabolism [FOO9]                                          | 0.004272     | 10      |

Supplementary Table 2: summary of the result of M/4,8,15,29 day data.

# Compound ranking

Tools [Help / feedback](#)

Start **Sample groups** View data Compound ranking Pathologies Sample details My data

Please define at least one sample group to proceed. Start by selecting compounds to the left. Then select doses and times.

Data... Rat  in vivo  Liver  Repeat

Compound

Sample group definition - new group

Rat/in vivo/Liver/Repeat/

Low Middle High

All  4 day  8 day  15 day  29 day  4 day  8 day  15 day  29 day  4 day  8 day  15 day  29 day

WY-14643  3/3  3/3  3/3  3/3  All  3/3  3/3  3/3  3/3  All  3/3  3/3  3/3  3/3  All

Save group as  Save Automatic groups

| Active                              | Group            | #Treated samples | #Control samples |      |        |
|-------------------------------------|------------------|------------------|------------------|------|--------|
| <input checked="" type="checkbox"/> | WY-14643_M_15day | 3                | 3                | Edit | Delete |
| <input type="checkbox"/>            | WY-14643_M_3hr   | 3                | 3                | Edit | Delete |
| <input checked="" type="checkbox"/> | WY-14643_M_29day | 3                | 3                | Edit | Delete |
| <input type="checkbox"/>            | WY-14643_M_3hr   | 3                | 3                | Edit | Delete |
| <input checked="" type="checkbox"/> | WY-14643_M_4day  | 3                | 3                | Edit | Delete |
| <input type="checkbox"/>            | WY-14643_M_9hr   | 3                | 3                | Edit | Delete |
| <input checked="" type="checkbox"/> | WY-14643_M_8day  | 3                | 3                | Edit | Delete |
| <input type="checkbox"/>            | WY-14643_M_9hr   | 3                | 3                | Edit | Delete |

Sort by name Select all Unselect all

Delete all groups Next: View data

① Select repeat dose data

② Click

File Gene Sets View Tools Help / feedback

Start **Show all** ← ① Click

Here you have sample groups you have defined. Click on column headers to sort data.

WY-14643 NewGeneSet

Log2 (FC) M15\_FC1.5\_cutoff4

WY-14643\_M\_29day WY-14643/Middle29 day WY-14643\_M\_4day WY-14643/Middle4 day WY-14643\_M\_8day WY-14643/Middle8 day

0.042 Show More p-value columns All Probes New Edit

|                                                             | Probe        | WY-14643_M... | WY-14643_M... | WY-14643_M... | WY-14643_M... |
|-------------------------------------------------------------|--------------|---------------|---------------|---------------|---------------|
| lipase 1                                                    | 1398260_at   | 10.307        | 10.505        | 10.941        | 9.335         |
| Aqp3 aquaporin 3                                            | 1387100_at   | 8.368         | 6.064         | 7.499         | 7.185         |
| LOC100911217 adipogenin-like                                | 1376298_at   | 6.15          | 6.062         | 5.391         | 5.681         |
|                                                             | 1384474_at   | 7.618         | 6.932         | 6.184         | 6.979         |
| Chna2 cholinergic receptor - nicotinic - alpha 2 (neuronal) | 1387574_at   | 7.573         | 6.721         | 3.357         | 4.693         |
| Hdc histidine decarboxylase                                 | 1370491_a_at | 7.257         | 7.385         | 7.247         | 7.373         |
| Fatp3 fatty acid binding protein 3 - muscle and heart       | 1367660_at   | 6.833         | 6.71          | 6.627         | 6.918         |
| RGD1305928 hypothetical LOC300207                           | 1380536_at   | 6.615         | 6.9           | 5.616         | 5.754         |
| Acot1 acyl-CoA thioesterase 1                               | 1368211_x_at | 6.489         | 6.167         | 6.76          | 6.733         |
| Fbp2 fructose-1,6-bisphosphatase 2                          | 1368622_at   | 6.078         | 5.799         | 4.471         | 6.139         |
| Abhd3 abhydrolase domain containing 3                       | 1362137_at   | 5.922         | 4.042         | 5.105         | 1.753         |
|                                                             | 1383757_at   | 5.757         | 5.589         | (absent)      | 5.54          |
| Cpt1b carnitine palmitoyltransferase 1b - muscle            | 1367742_at   | 5.648         | 5.414         | 5.372         | 5.456         |
| Aqp7 aquaporin 7                                            | 1368317_at   | 5.638         | 4.667         | 4.652         | 4.205         |
| Spink3 serine peptidase inhibitor - Kazal type 3            | 1368447_x_at | 5.097         | 4.123         | 1.297         | 2.692         |
| LOC100912469 Scd acyl-CoA desaturase 2-like                 | 1367668_a_at | 4.908         | 6.296         | 0.636         | 2.691         |
|                                                             |              |               |               |               |               |
|                                                             |              |               |               |               |               |

File Gene Sets View Tools Help / feedback

Start | Sample groups | **View data** | Compound ranking | Pathologies | Sample details | My data

Here you can inspect expression values for the sample groups you have defined. Click on column headers to sort data.

WY-14643\_M\_15day :WY-14643/Middle/15 day | WY-14643\_M\_29day :WY-14643/Middle/29 day | WY-14643\_M\_4day :WY-14643/Middle/4 day | WY-14643\_M\_8day :WY-14643/Middle/8 day

Log2 (fold change) 1-25 of 31,042 Show More  p-value columns All Probes New Edit

| Gene Symbol  | Probe Title                                     | Probe        | WY-14643_M_15day | WY-14643_M_29day | WY-14643_M_4day | WY-14643_M_8day |
|--------------|-------------------------------------------------|--------------|------------------|------------------|-----------------|-----------------|
| Acot1        | acyl-CoA thioesterase 1                         | 1388250_at   | 10.307           | 10.505           | 10.941          | 9.335           |
| Aqp3         | aquaporin 3                                     | 1387100_at   | 8.368            | 8.064            | 7.499           | 7.185           |
| LOC100911217 | adipogenin-like                                 | 1376296_at   | 8.15             | 6.052            | 5.391           | 5.881           |
|              | cholinergic receptor, nicotinic, gamma 5        |              |                  |                  | 6.184           | 5.979           |
|              | glutamate decarboxylase 1                       |              |                  |                  | 3.357           | 4.693           |
|              | glutamate decarboxylase 2                       |              |                  |                  | 7.247           | 7.373           |
| Fabp3        | fatty acid binding protein 3 - muscle and heart |              |                  |                  |                 | 6.754           |
| RGD1306926   | hypothetical LOC300207                          |              |                  |                  |                 |                 |
| Acot1        | acyl-CoA thioesterase 1                         | 1388211_s_at | 6.489            | 6.167            | 6.76            | 6.733           |
| Acot2        | acyl-CoA thioesterase 2                         |              |                  |                  |                 |                 |
| Fbp2         | fructose-1,6-bisphosphatase 2                   | 1388622_at   | 6.078            | 5.799            | 4.471           | 8.139           |
| Abhd3        | abhydrolase domain containing 3                 | 1382137_at   | 5.922            | 4.042            | 5.105           | 1.753           |
|              |                                                 | 1383757_at   | 5.757            | 5.389            | (absent)        | 5.94            |
| Cpt1b        | carntine palmitoyltransferase 1b - muscle       | 1367742_at   | 5.648            | 5.414            | 5.372           | 5.456           |
| Aqp7         | aquaporin 7                                     | 1368317_at   | 5.638            | 4.667            | 4.852           | 4.205           |
| Spink3       | serine peptidase inhibitor - Kazal type 3       | 1368447_x_at | 5.097            | 4.123            | 1.297           | 2.692           |
| LOC100912469 | acyl-CoA desaturase 2-like                      | 1367668_s_at | 4.995            | 6.290            | 0.636           | 2.891           |
|              | similar to Glutamyl-peptide                     |              |                  |                  |                 |                 |

**Edit filter**

Please choose a bound for 'WY-14643\_M\_15day'.  
Examples: 2.1, 1E-3

OK Clear filter

① Change to "x <="

② Input -1 for all filters

Here you can inspect expression values for the sample groups you have defined. Click on column headers to sort data.

WY-14643\_M\_15day WY-14643/Middle/15 day WY-14643\_M\_29day WY-14643/Middle/29 day WY-14643\_M\_4day WY-14643/Middle/4 day WY-14643\_M\_8day WY-14643/Middle/8 day

Log2 (fold change) 1-25 of 73 Show More p-value columns All Probes New **Click**

| Gene Symbol                | Probe Title                                                                                                  | Probe        | WY-14643_M... | WY-14643_M... | WY-14643_M... | WY-14643_M... |
|----------------------------|--------------------------------------------------------------------------------------------------------------|--------------|---------------|---------------|---------------|---------------|
| LOC100362769<br>Mt1a<br>Tr | hypothetical protein<br>LOC100362769                                                                         |              |               | 72            |               | -2.655        |
| St6galnac3                 | ST6 (alpha-N-acetyl-neuraminy-2-3-beta-galactosyl-1-3)-N-acetylgalactosaminide alpha-2-6-sialyltransferase 3 | 1368882_at   | -1.103        | -2.41         | -1.582        | -1.181        |
| C6                         | complement component 6                                                                                       | 1384580_at   | -1.163        | -1.817        | -1.121        | -1.527        |
| Cyp29d                     | cytochrome P450 - family 2 - subfamily d - polypeptide 4                                                     | 1387913_at   | -1.168        | -1.623        | -1.735        | -1.645        |
| Wip1                       | WD repeat domain - phosphoinositide interacting 1                                                            | 1373270_at   | -1.233        | -1.266        | -1.364        | -1.37         |
| Sipi                       | secretory leukocyte peptidase inhibitor                                                                      | 1367998_at   | -1.258        | -1.503        | -2.14         | -1.332        |
| Ass1                       | argininosuccinate synthase 1                                                                                 | 1370964_at   | -1.264        | -1.226        | -1.188        | -1.506        |
|                            |                                                                                                              | 1392713_x_at | -1.275        | -1.208        | -1.056        | -1.333        |
| Edra                       | endothelin receptor type A                                                                                   | 1383641_at   | -1.301        | -1.958        | -1.522        | -1.847        |
| LOC100362572               | Mpv17 transgene - kidney disease mutant-like (predicted)-like                                                | 1377051_at   | -1.331        | -1.106        | -1.121        | -1.579        |
| Lrp3                       | low density lipoprotein receptor-related protein 3                                                           | 1368239_at   | -1.344        | -1.151        | -1.179        | -1.295        |
| Ptpnf                      | protein tyrosine phosphatase - receptor type - F                                                             | 1368036_at   | -1.39         | -1.423        | -1.22         | -1.422        |
| Pde4b                      | phosphodiesterase 4B - cAMP specific                                                                         | 1374157_at   | -1.429        | -1.914        | -1.04         | -1.674        |

**73 probes are extracted**

File Gene Sets View Tools Help / feedback

Start | Sample groups | **View data** | Compound ranking | Pathologies | Sample details | My data

Here you can inspect expression values for the sample groups you have defined. Click on column headers to sort data.

WY-14643\_M\_15day WY-14643\_M\_15day WY-14643\_M\_15day WY-14643\_M\_15day WY-14643\_M\_15day WY-14643\_M\_15day WY-14643\_M\_15day WY-14643\_M\_15day

**Gene set editor**

Title: **downregulated\_Wy** ← ① Edit

**Keyword search**

This lets you view probes that correspond to a given KEGG pathway or GO term. Enter a partial pathway name and press enter to search.

KEGG Pathway, GO term... Load

**Selected probes**

- LOC100362769/Mt1a/Ttr (1371237\_a\_at)
- Slc6galnac3 (1368862\_at)
- C6 (1384590\_at)
- Cyp2d4 (1387913\_at)
- Wpi1 (1373270\_at)
- Slpi (1367996\_at)
- Aas1 (1370964\_at)
- (1392713\_a\_at)
- Edna (1383641\_at)
- LOC100362572 (1377051\_at)
- Lp3 (1368239\_at)
- Pgrf (1368036\_at)
- Pde4b (1374157\_at)
- Cyp211 (1368265\_at)
- Pgrf (1368035\_a\_at)
- Aboc9 (1374171\_at)
- Bmf (1369902\_at)
- Aboc8 (1369632\_a\_at)
- Slc22a8 (1385005\_at)
- Slc9a3r1 (1387793\_at)
- Nat8 (1387336\_at)
- Cyp2c11/LOC100911626 (1387328\_at)

Remove selected probes Remove all probes

Cancel **Save** ← ② Click

**Targets**

**Clustering**

**Free selection**

| Gene Symbol                 | Pro                                                         | Log2 (fold change) | ...    | WY-14643_M_15day |        |        |
|-----------------------------|-------------------------------------------------------------|--------------------|--------|------------------|--------|--------|
| LOC100362769<br>Mt1a<br>Ttr | tr                                                          |                    |        | -2.886           |        |        |
| Slc6galnac3                 | ST<br>-3-<br>ace<br>sial                                    |                    |        | -1.181           |        |        |
| C6                          | con                                                         |                    |        | -1.827           |        |        |
| Cyp2d4                      | cyt<br>sub                                                  |                    |        | -1.646           |        |        |
| Wpi1                        | WD<br>pho                                                   |                    |        | -1.37            |        |        |
| Slpi                        | sec<br>inhi                                                 |                    |        | -1.332           |        |        |
| Aas1                        | arg                                                         |                    |        | -1.508           |        |        |
| Edna                        | end                                                         |                    |        | -1.333           |        |        |
| LOC100362572                | Mp<br>mul                                                   |                    |        | -1.847           |        |        |
| Lp3                         | low<br>rela                                                 |                    |        | -1.879           |        |        |
| Pgrf                        | pro<br>reo                                                  |                    |        | -1.295           |        |        |
| Pde4b                       | pho<br>specific                                             | 1374157_at         | -1.429 | -1.914           | -1.04  | -1.374 |
| Cyp211                      | cytochrome P450 - family 2 -<br>subfamily 1 - polypeptide 1 | 1368265_at         | -1.471 | -1.662           | -1.127 | -1.77  |
| Pgrf                        | protein tyrosine phosphatase -<br>receptor type - F         | 1368035_a_at       | -1.502 | -1.407           | -1.037 | -1.826 |



Here you can inspect expression values for the sample groups you have defined. Click on column headers to sort data.

WY-14643\_M\_15day : WY-14643/Middle/15 day | WY-14643\_M\_29day : WY-14643/Middle/29 day | WY-14643\_M\_4day : WY-14643/Middle/4 day | WY-14643\_M\_8day : WY-14643/Middle/8 day

Log2 (fold change) 1.25 of 73 Show More  p-value columns downregulated\_WY New Edit

| Gene Symbol                 | Probe Title                                                                                                   | Probe        | WY-14643_M... | WY-14643_M... | WY-14643_M... | WY-14643_M... |
|-----------------------------|---------------------------------------------------------------------------------------------------------------|--------------|---------------|---------------|---------------|---------------|
| LOC100362769<br>Mtl1a<br>Tr | transthyretin                                                                                                 | 1371237_at   | -1.098        | -2.126        | -2.372        | -2.886        |
| Stlgalnac3                  | ST6 (alpha-N-acetyl-neuraminyl-2-3-beta-galactosyl-1-3)-N-acetylgalactosaminide alpha-2-6-sialyltransferase 3 | 1368662_at   | -1.503        | -2.41         | -1.582        | -1.181        |
| C6                          | complement component 6                                                                                        | 1384560_at   | -1.163        | -1.617        | -1.121        | -1.527        |
| Cyp2d4                      | cytochrome P450 - family 2 - subfamily d - polypeptide 4                                                      | 1387913_at   | -1.166        | -1.623        | -1.735        | -1.645        |
| Wp1                         | WD repeat domain - phosphoinositide interacting 1                                                             | 1373270_at   | -1.233        | -1.268        | -1.364        | -1.37         |
| Slpi                        | secretory leukocyte peptidase inhibitor                                                                       | 1367998_at   | -1.256        | -1.503        | -2.14         | -1.332        |
| Ass1                        | argininosuccinate synthase 1                                                                                  | 1370964_at   | -1.264        | -1.226        | -1.188        | -1.506        |
|                             |                                                                                                               | 1392713_a_at | -1.275        | -1.208        | -1.056        | -1.303        |
| Ednra                       | endothelin receptor type A                                                                                    | 1383641_at   | -1.301        | -1.569        | -1.522        | -1.847        |
| LOC100362572                | Mpv17 transgene - kidney disease mutant-like (predicted)-like                                                 | 1377051_at   | -1.331        | -1.106        | -1.121        | -1.579        |
| Lp3                         | low density lipoprotein receptor-related protein 3                                                            | 1368239_at   | -1.344        | -1.151        | -1.179        | -1.286        |
| Pgprf                       | protein tyrosine phosphatase - receptor type - F                                                              | 1368036_at   | -1.39         | -1.423        | -1.22         | -1.422        |
| Pde4b                       | phosphodiesterase 4B - cAMP specific                                                                          | 1374157_at   | -1.429        | -1.914        | -1.04         | -1.674        |

① Select rat/in vivo/Liver/Repeat

Tools [Help / feedback](#)

Start | [Sample groups](#) | [View data](#) | **Compound ranking** | [Pathologies](#) | [Sample details](#) | [My data](#)

Specify at least one gene symbol to rank compounds according to their effect.

Data: **Rat** | **In vivo** | **Liver** | **Single**

Compound

|                          |                        |
|--------------------------|------------------------|
| <input type="checkbox"/> | 2,4-dinitrophenol      |
| <input type="checkbox"/> | 2-nitrofluorene        |
| <input type="checkbox"/> | 3-methylcholanthrene   |
| <input type="checkbox"/> | LPS                    |
| <input type="checkbox"/> | N-methyl-N-nitrosourea |
| <input type="checkbox"/> | N-nitrosomorpholine    |
| <input type="checkbox"/> | TNFalpha               |
| <input type="checkbox"/> | WY-14543               |
| <input type="checkbox"/> | sarbose                |
| <input type="checkbox"/> | acetamidofluorene      |
| <input type="checkbox"/> | acetaminophen          |
| <input type="checkbox"/> | acetazolamide          |
| <input type="checkbox"/> | adapin                 |
| <input type="checkbox"/> | aflatoxin B1           |
| <input type="checkbox"/> | ajmaline               |
| <input type="checkbox"/> | allopurinol            |
| <input type="checkbox"/> | allyl alcohol          |
| <input type="checkbox"/> | amiodarone             |
| <input type="checkbox"/> | amitriptyline          |
| <input type="checkbox"/> | amphotericin B         |

Gene set:  Save Delete Set all... Clear rules

Gene/probe:  Match type:

Rank

② Select "Set:downregulated\_WY"

Sort by name Select all Unselect all

Specify at least one gene symbol to rank compounds according to their effect.

Data... Rat In vivo Liver Repeat

Compound

Gene set: Setdownregulated\_WY Save Delete **Set all...** Clear rules

- 1% cholesterol + 0.25% sodium cholate
- 2,4-dinitrophenol
- WY-14643
- acarbose
- acetamide
- acetamidofluorene
- acetaminophen
- acetazolamide
- adapin
- ajmaline
- allopurinol
- allyl alcohol
- amiodarone
- amitriptyline
- amphotericin B
- aspirin
- azathioprine
- bendazac
- benzbromarone
- benzydaron

Sort by name Select all Unselect all

| Gene/probe                                       | Match type         |
|--------------------------------------------------|--------------------|
| <input checked="" type="checkbox"/> 1385005_at   | Total upregulation |
| <input checked="" type="checkbox"/> 1370779_x_at | Total upregulation |
| <input checked="" type="checkbox"/> 1384580_at   | Total upregulation |
| <input checked="" type="checkbox"/> 1370964_at   | Total upregulation |
| <input checked="" type="checkbox"/> 1369864_a_at | Total upregulation |
| <input checked="" type="checkbox"/> 1374251_at   | Total upregulation |
| <input checked="" type="checkbox"/> 1389725_at   | Total upregulation |
| <input checked="" type="checkbox"/> 1377048_at   | Total upregulation |
| <input checked="" type="checkbox"/> 1392713_a_at | Total upregulation |
| <input checked="" type="checkbox"/> 1369044_a_at | Total upregulation |
| <input checked="" type="checkbox"/> 1390783_at   | Total upregulation |
| <input checked="" type="checkbox"/> 1371237_a_at | Total upregulation |
| <input checked="" type="checkbox"/> 1398759_at   | Total upregulation |
| <input checked="" type="checkbox"/> 1383165_at   | Total upregulation |

② Click

① Select "Total downregulation"

Specify at least one gene symbol to rank compounds according to their effect.

Data: [Rat](#) | [In vivo](#) | [Liver](#) | [Repeat](#)

Compound

Gene set: [Set downregulated\\_WY](#) | [Save](#) | [Delete](#) | [Set all...](#) | [Clear rules](#)

| Compound                                                       | Gene/probe                                       | Match type             |
|----------------------------------------------------------------|--------------------------------------------------|------------------------|
| <input type="checkbox"/> 1% cholesterol + 0.25% sodium cholate | <input checked="" type="checkbox"/> 1365005_at   | Total downregulation ↓ |
| <input type="checkbox"/> 2,4-dinitrophenol                     | <input checked="" type="checkbox"/> 1370775_x_at | Total upregulation ↓   |
| <input type="checkbox"/> WY-14643                              | <input checked="" type="checkbox"/> 1364580_at   | Total upregulation ↓   |
| <input type="checkbox"/> acarbose                              | <input checked="" type="checkbox"/> 1362778_at   | Total upregulation ↓   |
| <input type="checkbox"/> acetamide                             |                                                  |                        |
| <input type="checkbox"/> acetamidofluorene                     |                                                  |                        |
| <input type="checkbox"/> acetaminophen                         |                                                  |                        |
| <input type="checkbox"/> acetazolamide                         |                                                  |                        |
| <input type="checkbox"/> adapin                                |                                                  |                        |
| <input type="checkbox"/> ajmaline                              | <input checked="" type="checkbox"/> 1374251_at   | Total upregulation ↓   |
| <input type="checkbox"/> allopurinol                           | <input checked="" type="checkbox"/> 1369725_at   | Total upregulation ↓   |
| <input type="checkbox"/> allyl alcohol                         | <input checked="" type="checkbox"/> 1377048_at   | Total upregulation ↓   |
| <input type="checkbox"/> amiodarone                            |                                                  |                        |
| <input type="checkbox"/> amitriptyline                         | <input checked="" type="checkbox"/> 1362713_a_at | Total upregulation ↓   |
| <input type="checkbox"/> amphotericin B                        | <input checked="" type="checkbox"/> 1369044_a_at | Total upregulation ↓   |
| <input type="checkbox"/> aspirin                               | <input checked="" type="checkbox"/> 1360783_at   | Total upregulation ↓   |
| <input type="checkbox"/> azathioprine                          | <input checked="" type="checkbox"/> 1371237_a_at | Total upregulation ↓   |
| <input type="checkbox"/> bendazac                              | <input checked="" type="checkbox"/> 1368759_at   | Total upregulation ↓   |
| <input type="checkbox"/> benzbromarone                         |                                                  |                        |
| <input type="checkbox"/> benzodolone                           | <input checked="" type="checkbox"/> 1363165_at   | Total upregulation ↓   |

Override all rule parameters by copying the first rule?

[キャンセル](#) [OK](#)

① Click

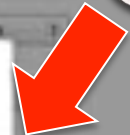

Specify at least one gene symbol to rank compounds according to their effect.

Data... [Rat](#) | [in vivo](#) | [Liver](#) | [Repeat](#)

Compound

Gene set: [Set:downregulated\\_WY](#) | [Save](#) | [Delete](#) | [Set all...](#) | [Clear rules](#)

- 1% cholesterol + 0.25% sodium cholate
- 2,4-dinitrophenol
- WY-14643
- acarbose
- acetamide
- acetamidofluorene
- acetaminophen
- acetazolamide
- adapin
- ajmaline
- allopurinol
- allyl alcohol
- amiodarone
- amitriptyline
- amphotericin B
- aspirin
- azathioprine
- bendazac
- benzbromarone
- benzoclonone

[Sort by name](#) | [Select all](#) | [Unselect all](#)

Gene/probe

Match type

|                                     |              |                        |
|-------------------------------------|--------------|------------------------|
| <input checked="" type="checkbox"/> | 1385005_at   | Total downregulation ↓ |
| <input checked="" type="checkbox"/> | 1370779_x_at | Total downregulation ↓ |
| <input checked="" type="checkbox"/> | 1384580_at   | Total downregulation ↓ |
| <input checked="" type="checkbox"/> | 1382778_at   | Total downregulation ↓ |
| <input checked="" type="checkbox"/> | 1370964_at   | Total downregulation ↓ |
| <input checked="" type="checkbox"/> | 1369864_a_at | Total downregulation ↓ |
| <input checked="" type="checkbox"/> | 1374251_at   | Total downregulation ↓ |
| <input checked="" type="checkbox"/> | 1389725_at   | Total downregulation ↓ |
| <input checked="" type="checkbox"/> | 1377048_at   | Total downregulation ↓ |
| <input checked="" type="checkbox"/> | 1392713_a_at | Total downregulation ↓ |
| <input checked="" type="checkbox"/> | 1369044_a_at | Total downregulation ↓ |
| <input checked="" type="checkbox"/> | 1390783_at   | Total downregulation ↓ |
| <input checked="" type="checkbox"/> | 1371237_a_at | Total downregulation ↓ |
| <input checked="" type="checkbox"/> | 1398759_at   | Total downregulation ↓ |
| <input checked="" type="checkbox"/> | 1383185_at   | Total downregulation ↓ |

① Match type: "Total downregulation"

② Scroll down

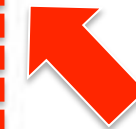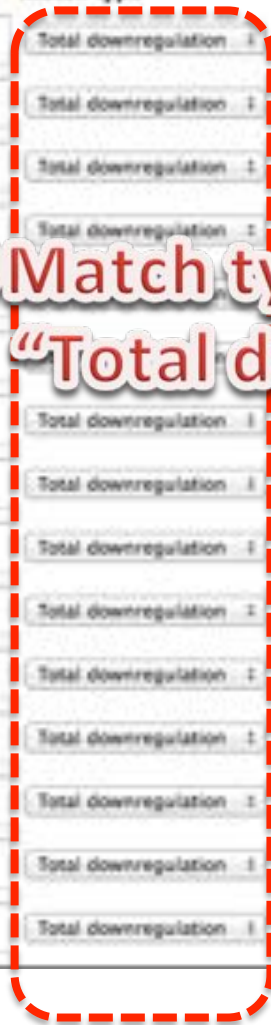

Specify at least one gene symbol to rank compounds according to their effect.

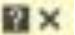

Data...

Compound

- 1% cholesterol + 0.25% sodium cholate
- 2,4-dinitrophenol
- WY-14643
- acarbose
- acetamide
- acetamidofluorene
- acetaminophen
- acetazolamide
- adapin
- ajmaline
- allopurinol
- allyl alcohol
- amiodarone
- amitriptyline
- amphotericin B
- aspirin
- azathioprine
- bendazac
- benzbromarone
- benzdicarone

Sort by name

Select all

Unselect all

|                                     |              |                      |
|-------------------------------------|--------------|----------------------|
| <input checked="" type="checkbox"/> | 1390873_at   | Total downregulation |
| <input checked="" type="checkbox"/> | 1369491_at   | Total downregulation |
| <input checked="" type="checkbox"/> | 1385001_at   | Total downregulation |
| <input checked="" type="checkbox"/> | 1369632_a_at | Total downregulation |
| <input checked="" type="checkbox"/> | 1369440_at   | Total downregulation |
| <input checked="" type="checkbox"/> | 1369953_at   | Total downregulation |
| <input checked="" type="checkbox"/> | 1383111_at   | Total downregulation |
| <input checked="" type="checkbox"/> | 1377472_at   | Total downregulation |
| <input checked="" type="checkbox"/> | 1383641_at   | Total downregulation |
| <input checked="" type="checkbox"/> | 1368239_at   | Total downregulation |
| <input checked="" type="checkbox"/> | 1369973_at   | Total downregulation |
| <input checked="" type="checkbox"/> | 1387913_at   | Total downregulation |
| <input checked="" type="checkbox"/> | 1368543_at   | Total downregulation |
| <input checked="" type="checkbox"/> | 1387053_at   | Total downregulation |
| <input checked="" type="checkbox"/> | 1367998_at   | Total downregulation |
| <input type="checkbox"/>            |              | Total downregulation |

Rank

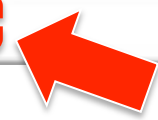

① Click

Tools [Help / feedback](#)

Start | **Sample groups** | **View data** | **Compound ranking** | Pathologies | Sample details | My data

Specify at least one gene symbol to rank compounds

Data...

**① Click for next analysis**

| Compound                                     |               |  |
|----------------------------------------------|---------------|--|
|                                              | Score         |  |
| <input type="checkbox"/> WY-14643            | 34.985<br>(1) |  |
| <input type="checkbox"/> fenofibrate         | 25.208<br>(2) |  |
| <input type="checkbox"/> methacyllene        | 19.388<br>(3) |  |
| <input type="checkbox"/> nitrosodiethylamine | 11.938<br>(4) |  |
| <input type="checkbox"/> thioacetamide       | 9.803<br>(5)  |  |
| <input type="checkbox"/> ethambutol          | 9.78<br>(6)   |  |
| <input type="checkbox"/> methylene dianiline | 9.588<br>(7)  |  |
| <input type="checkbox"/> ethionamide         | 9.428<br>(8)  |  |
| <input type="checkbox"/> acetamidofluorene   | 8.304<br>(9)  |  |
| <input type="checkbox"/> meloxicam           | 5.085<br>(10) |  |
| <input type="checkbox"/> gemfibrozil         | 5.072<br>(11) |  |
| <input type="checkbox"/> terbinafine         | 5.048<br>(12) |  |

**Result of compound ranking**

|                                                  |                      |
|--------------------------------------------------|----------------------|
| <input checked="" type="checkbox"/> 1390673_at   | Total downregulation |
| <input checked="" type="checkbox"/> 1369491_at   | Total downregulation |
| <input checked="" type="checkbox"/> 1385001_at   | Total downregulation |
| <input checked="" type="checkbox"/> 1369632_a_at | Total downregulation |
| <input checked="" type="checkbox"/> 1369440_at   | Total downregulation |
| <input checked="" type="checkbox"/> 1388053_at   | Total downregulation |
| <input checked="" type="checkbox"/> 1383111_at   | Total downregulation |
| <input checked="" type="checkbox"/> 1383641_at   | Total downregulation |
| <input checked="" type="checkbox"/> 1368239_at   | Total downregulation |
| <input checked="" type="checkbox"/> 1369973_at   | Total downregulation |
| <input checked="" type="checkbox"/> 1387913_at   | Total downregulation |
| <input checked="" type="checkbox"/> 1368543_at   | Total downregulation |
| <input checked="" type="checkbox"/> 1387053_at   | Total downregulation |
| <input checked="" type="checkbox"/> 1367068_at   | Total downregulation |
| <input type="checkbox"/>                         | Total downregulation |

# Welch's t-test filtering

The screenshot shows a software interface with a menu bar (File, Gene Sets, View, Tools, Help / feedback) and a sidebar on the left. The main area displays a table of probe data. A red dashed box highlights the 'Show all' button in the top left, with a red arrow pointing to it and a circled '1' next to the text 'Click to show all probes'.

Start **Show all** ← ① Click to show all probes

Here you have defined. Click on column headers to sort data.

WY-14643\_M\_29day WY-14643/Middle/29 day WY-14643\_M\_4day WY-14643/Middle/4 day WY-14643\_M\_8day WY-14643/Middle/8 day

Show More  p-value columns downregulated\_WY New Edit

| Probe      | WY-14643_M... | WY-14643_M... | WY-14643_M... | WY-14643_M... |
|------------|---------------|---------------|---------------|---------------|
| 1371237_at | -1.098        | -2.128        | -2.372        | -2.855        |
| 1368882_at | -1.103        | -2.41         | -1.582        | -1.181        |
| 1384560_at | -1.163        | -1.617        | -1.121        | -1.527        |
| 1387913_at | -1.166        | -1.623        | -1.735        | -1.645        |
| 1373270_at | -1.233        | -1.265        | -1.364        | -1.37         |
| 1367998_at | -1.258        | -1.503        | -2.14         | -1.332        |
| 1370964_at | -1.264        | -1.225        | -1.188        | -1.505        |
| 1392713_at | -1.275        | -1.208        | -1.056        | -1.333        |
| 1383641_at | -1.301        | -1.959        | -1.522        | -1.847        |
| 1377051_at | -1.331        | -1.105        | -1.121        | -1.579        |
| 1368239_at | -1.344        | -1.151        | -1.179        | -1.295        |
| 1368036_at | -1.39         | -1.423        | -1.22         | -1.422        |
| 1374157_at | -1.429        | -1.914        | -1.04         | -1.874        |



File Gene Sets View **Tools** ① Click

Start Sample groups ② Select

Here you can inspect expression

WY-14643\_M\_15day : WY-14643 Show heat map

Log2 (fold change) 1-25 of 31,042 Show More p-value columns All Probes New Edit

| Gene Symbol         | Probe Title                                           | Probe        | WY-14643_M... | WY-14643_M... | WY-14643_M... | WY-14643_M... |
|---------------------|-------------------------------------------------------|--------------|---------------|---------------|---------------|---------------|
| Acot1               | acyl-CoA thioesterase 1                               | 1398250_at   | 10.307        | 10.605        | 10.941        | 9.335         |
| Acp3                | aquaporin 3                                           | 1387100_at   | 6.366         | 6.064         | 7.499         | 7.185         |
| LOC100911217        | adipogenin-like                                       | 1376296_at   | 6.15          | 6.052         | 5.391         | 5.681         |
|                     |                                                       | 1384474_at   | 7.818         | 6.932         | 6.184         | 6.079         |
| Chma2               | cholinergic receptor - nicotinic - alpha 2 (neuronal) | 1387574_at   | 7.573         | 6.721         | 3.357         | 4.693         |
| Hdc                 | histidine decarboxylase                               | 1370491_a_at | 7.257         | 7.385         | 7.247         | 7.373         |
| Fabp3               | fatty acid binding protein 3 - muscle and heart       | 1387660_at   | 6.633         | 6.71          | 6.627         | 6.918         |
| RGD1305928          | hypothetical LOC300207                                | 1380536_at   | 6.615         | 6.9           | 5.616         | 5.754         |
| Acot1<br>Acot2      | acyl-CoA thioesterase 2                               | 1388211_s_at | 6.489         | 6.167         | 6.76          | 6.733         |
| Fbp2                | fructose-1 -6-bisphosphatase 2                        | 1368622_at   | 6.078         | 5.799         | 4.471         | 6.139         |
| Abhd3               | abhydrolase domain containing 3                       | 1382137_at   | 5.922         | 4.042         | 5.106         | 1.753         |
|                     |                                                       | 1383757_at   | 5.757         | 5.389         | (absent)      | 5.54          |
| Cpt1b               | carnitine palmitoyltransferase 1b - muscle            | 1367742_at   | 5.648         | 5.414         | 5.372         | 5.466         |
| Acp7                | aquaporin 7                                           | 1368317_at   | 5.638         | 4.667         | 4.852         | 4.205         |
| Spink3              | serine peptidase inhibitor - Kazal type 3             | 1368447_x_at | 5.097         | 4.123         | 1.297         | 2.692         |
| LOC100912469<br>Scd | stearoyl-CoA desaturase (delta-9-desaturase)          | 1367668_a_at | 4.966         | 6.296         | 0.836         | 2.891         |
|                     | similar to Glutamyl-peptide                           |              |               |               |               |               |

File Gene Sets View Tools Help / feedback

Start | Sample groups **View** | Sample details | My data

Here you can inspect expression values for the sample groups you have selected. Click on column headers to sort data.

WY-14643\_M\_15day WY-14643/Middle/15 day WY-14643\_M\_29day WY-14643/Middle/29 day WY-14643\_M\_4day WY-14643/Middle/4 day WY-14643\_M\_8day WY-14643/Middle/8 day

Log2 (fold change) 1.25 of 31,042  More  p-value columns All Probes New Edit

WY-14643\_M\_29day WY-14643\_M\_4day **Add T-Test** **Add U-Test** Add fold-change difference Remove tests

| Gene Symbol  | Probe Title                                           | Probe        | WY-14643_M... | WY-14643_M... | WY-14643_M... | WY-14643_M... |
|--------------|-------------------------------------------------------|--------------|---------------|---------------|---------------|---------------|
| Acot1        | acyl-CoA thioesterase 1                               | 1398250_at   | 10.307        | 10.505        | 10.941        | 9.335         |
| Aqp3         | aquaporin 3                                           | 1388211_s_at | 6.064         | 6.064         | 7.499         | 7.185         |
| LOC10091121  | adipogenin-like                                       | 1388211_s_at | 6.052         | 6.052         | 5.391         | 5.881         |
|              |                                                       | 1384474_at   | 7.818         | 6.932         | 6.184         | 5.979         |
| Chma2        | cholinergic receptor - nicotinic - alpha 2 (neuronal) | 1387574_at   | 7.573         | 6.721         | 3.357         | 4.690         |
|              |                                                       | 1387574_at   | 7.370         | 7.385         | 7.247         | 7.373         |
|              |                                                       | 1387574_at   | 6.633         | 6.71          | 6.627         | 6.918         |
| RGD1         |                                                       | 1387574_at   | 6.9           | 6.9           | 5.618         | 5.754         |
| Acot1        | acyl-CoA thioesterase 2                               | 1388211_s_at | 6.489         | 6.167         | 6.76          | 6.733         |
| Acot2        | acyl-CoA thioesterase 2                               | 1388211_s_at | 6.489         | 6.167         | 6.76          | 6.733         |
| Fbp2         | fructose-1,6-bisphosphatase 2                         | 1368622_at   | 6.076         | 5.799         | 4.471         | 6.139         |
| Abhd3        | abhydrolase domain containing 3                       | 1382137_at   | 5.922         | 4.042         | 5.105         | 1.753         |
|              |                                                       | 1383757_at   | 5.757         | 5.389         | (absent)      | 5.54          |
| Cpt1b        | carnitine palmitoyltransferase 1b - muscle            | 1367742_at   | 5.648         | 5.414         | 5.372         | 5.458         |
| Aqp7         | aquaporin 7                                           | 1388317_at   | 5.638         | 4.667         | 4.852         | 4.205         |
| Spink3       | serine peptidase inhibitor - Kazal type 3             | 1368447_x_at | 5.097         | 4.123         | 1.297         | 2.692         |
| LOC100912489 | stearoyl-CoA desaturase (delta-9-                     | 1367668_s_at | 4.998         | 6.305         | 6.636         | 7.991         |

**① Newly appears**

**② Select "WY-14643\_M\_4day" and "WY-14643\_M\_8day"**

**③ Click**

① Newly appears

② Click

File Gene Sets View Tools Help / feedback

Start Sample groups **View data** Compound ranking Pathologies Sample details My data

Here you can inspect expression values for the sample groups you have defined. Click on column headers to sort data.

WY-14643\_M\_15day :WY-14643/Middle/15 day WY-14643\_M\_29day :WY-14643/Middle/29 day WY-14643\_M\_4day :WY-14643/Middle/4 day WY-14643\_M\_8day :WY-14643/Middle/8 day

Log2 (fold change) 1 1-25 of 31,042 Show More p-value columns All Probes New Edit

WY-14643\_M\_4day WY-14643\_M\_8day Add T-Test Add U-Test Add fold-change difference Remove tests

| I | Probe Title                                           | Probe        | WY-14643_M... | WY-14643_M... | WY-14643_M... | WY-14643_M... | (T) p(WY-1... |
|---|-------------------------------------------------------|--------------|---------------|---------------|---------------|---------------|---------------|
|   | acyl-CoA thioesterase 1                               | 1386250_at   | 10.307        | 10.505        | 10.941        | 9.335         | 0.001         |
|   | aquaporin 3                                           | 1387100_at   | 8.368         | 8.064         | 7.499         | 7.185         | 0.997         |
| 7 | adipogenin-like                                       | 1376296_at   | 8.15          | 6.052         | 5.391         | 5.881         | 0.434         |
|   |                                                       | 1384474_at   | 7.818         | 6.932         | 6.184         | 5.979         | 0.703         |
|   | cholinergic receptor - nicotinic - alpha 2 (neuronal) | 1387574_at   | 7.573         | 6.721         | 3.357         | 4.603         | 0.027         |
|   | histidine decarboxylase                               | 1370491_x_at | 7.257         | 7.385         | 7.247         | 7.373         | 0.693         |
|   | fatty acid binding protein 3 - muscle and heart       | 1367660_at   | 6.833         | 6.71          | 6.627         | 6.916         | 0.37          |
|   | hypothetical LOC300207                                | 1380536_at   | 6.815         | 6.9           | 5.616         | 5.754         | 0.682         |
|   | acyl-CoA thioesterase 2                               | 1388211_x_at | 6.489         | 6.167         | 6.76          | 6.733         | 0.879         |
|   | fructose-1-6-bisphosphatase 2                         | 1368622_at   | 6.078         | 5.799         | 4.471         | 6.139         | 0.007         |
|   | abhydrolase domain containing 3                       | 1382137_at   | 5.922         | 4.042         | 5.105         | 1.753         | 0.069         |
|   |                                                       | 1383757_at   | 5.757         | 5.389         | (absent)      | 5.54          | (absent)      |
|   | camitine palmitoyltransferase 1b - muscle             | 1367742_at   | 5.648         | 5.414         | 5.372         | 5.456         | 0.755         |
|   | aquaporin 7                                           | 1368317_at   | 5.638         | 4.667         | 4.852         | 4.205         | 0.134         |
|   | serine peptidase inhibitor - Kazal type 3             | 1368447_x_at | 5.097         | 4.123         | 1.297         | 2.692         | 0.07          |
| 8 | stearoyl-CoA desaturase (delta-5)                     | 1367668_x_at | 4.885         | 5.296         | 5.816         | 5.891         | 0.001         |

Here you can inspect expression values for the sample groups you have defined. Click on column headers to sort data.

WY-14643\_M\_15day : WY-14643/Middle/15 day WY-14643\_M\_29day : WY-14643/Middle/29 day WY-14643\_M\_4day : WY-14643/Middle/4 day WY-14643\_M\_8day : WY-14643/Middle/8 day

Log2 (fold change) 1-25 of 31,042 Show More p-value columns All Probes New Edit

WY-14643\_M\_4day fold-change difference Remove tests

|   | Probe Title                                           | Probe        | WY-14643_M... | WY-14643_M... | WY-14643_M... | WY-14643_M... | (T) p(WY-1... |
|---|-------------------------------------------------------|--------------|---------------|---------------|---------------|---------------|---------------|
|   | acyl-CoA thioesterase 1                               | 13962        | 10.307        | 10.505        | 10.941        | 8.305         | 0.001         |
|   | aquaporin 3                                           | 138710       | 8.22          | 8.22          | 8.22          | 7.185         | 0.997         |
| 7 | adipogenin-like                                       | 1376296_at   | 15            | 15            | 15            | 5.681         | 0.434         |
|   |                                                       | 1384474_at   | 81            | 81            | 81            | 5.979         | 0.703         |
|   | cholinergic receptor - nicotinic - alpha 2 (neuronal) | 1387574_at   | 57            | 57            | 57            | 1.993         | 0.027         |
|   | histidine decarboxylase                               | 1370491_s_at | 25            | 25            | 25            | 6.918         | 0.37          |
|   | fatty acid binding protein 3 - muscle and heart       | 1387660_at   | 83            | 83            | 83            | 5.754         | 0.682         |
|   | hypothetical LOC300207                                | 1380536_at   | 6.615         | 6.615         | 6.615         | 6.731         | 0.879         |
|   | acyl-CoA thioesterase 2                               | 1388211_s_at | 6.489         | 167           | 6.76          | 6.139         | 0.007         |
|   | fructose-1-6-bisphosphatase 2                         | 1388622_at   | 6.078         | 5.709         | 4.471         | 1.753         | 0.069         |
|   | abhydrolase domain containing 3                       | 1382137_at   | 5.923         | 5.923         | 5.106         | 5.54          | (absent)      |
|   |                                                       | 1383757_at   | 5.757         | 5.389         | (absent)      | 5.54          | (absent)      |
|   | carnitine palmitoyltransferase 1b - muscle            | 1387742_at   | 5.648         | 5.414         | 5.372         | 5.455         | 0.755         |
|   | aquaporin 7                                           | 1388317_at   | 5.638         | 4.667         | 4.852         | 4.205         | 0.134         |
|   | serine peptidase inhibitor - Kazal type 3             | 1388447_x_at | 5.097         | 4.123         | 1.297         | 2.692         | 0.07          |
| 9 | stearoyl-CoA desaturase (delta-9-                     | 1387968_s_at | 4.955         | 6.705         | 6.935         | 7.891         | 0.001         |

① Newly appears

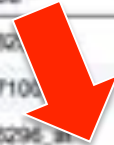

**Edit filter**

Please choose a bound for '(T) p(WY-14643\_M\_4day, WY-14643\_M\_8day)'. Examples: 2.1, 1E-3

OK Clear filter

② Input 0.01

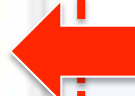

③ Click

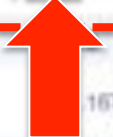

① 618 probes are extracted

The screenshot shows a web-based interface for analyzing gene expression data. At the top, there are navigation tabs: "Start", "Sample groups", "My data", "Compound ranking", "Pathologies", "Sample details", and "My data". Below the tabs, a text box explains that users can inspect expression values for sample groups. A list of sample groups is shown, including "WY-14643\_M\_15day" and "WY-14643\_M\_29day". A filter bar indicates "Log2 (fold change)" and "1-25 of 618" probes are currently displayed. A "New" button is highlighted with a red dashed box. Below the filter bar, there are buttons for "Add T-Test", "Add U-Test", "Add fold-change difference", and "Remove". The main area is a table of probe data with columns for Gene Symbol, Probe Title, Probe ID, and expression values for different sample groups. A red arrow points to the "New" button, and another red arrow points to the "Add T-Test" button. A large text overlay with a red border and shadow reads "② Save these probes as 'M4vsM8\_p0.01'".

| Gene Symbol         | Probe Title                                                 | Probe        | WY-14643_M_... | WY-14643_M_... | WY-14643_M_... | WY-14643_M_... |
|---------------------|-------------------------------------------------------------|--------------|----------------|----------------|----------------|----------------|
| Acot1               | acyl-CoA thioesterase 1                                     | 1308250_at   |                |                |                | 9.335          |
| Fbp2                | fructose-1,6-bisphosphatase 2                               | 1308622_at   |                |                |                | 6.139          |
| LOC100912469<br>Scd | stearoyl-CoA desaturase (delta-9-desaturase)                | 1367666_a_at | 4.566          |                |                | 2.891          |
| Hpgd                | hydroxyprostaglandin dehydrogenase 15 (NAD)                 | 1367631_at   | 4.505          | 3.303          | 1.831          | 4.195          |
| Asns                | asparagine synthetase (glutamine-hydrolyzing)               | 1367925_at   | 4.090          | 4.068          | 1.995          | 3.204          |
| Aldh1a1             | aldehyde dehydrogenase 1 family - member A1                 | 1367022_at   | 3.688          | 3.437          | 3.251          | 3.654          |
| Ech1                | enoyl CoA hydratase 1 - peroxisomal                         | 1366885_at   | 3.364          | 3.451          | 3.212          | 3.611          |
| Ethadh              | enoyl-CoA - hydratase/3-hydroxyacyl CoA dehydrogenase       | 1368283_at   | 3.044          | 3.139          | 3.129          | 3.057          |
| Acaa1a<br>Acaa1b    | acetyl-Coenzyme A acyltransferase 1B                        | 1367783_a_at | 2.744          | 3.016          | 2.894          | 3.253          |
| Sort1               | sortilin-related receptor - LDLR class A repeats-containing | 1394786_at   | 2.489          | 2.036          | 1.326          | 1.744          |
| Ten1                | TEN1 telomerase capping complex subunit                     | 1363230_at   | 2.456          | 3.131          | 0.812          | 1.949          |
| Miox                | myo-inositol oxygenase                                      | 1367937_at   | 2.306          | 2.581          | 2.701          | 2.02           |
| Lamc2               | laminin - gamma 2                                           | 1379340_at   | 1.869          | (absent)       | 1.031          | 2.952          |
| ...                 | ...                                                         | ...          | ...            | ...            | ...            | ...            |

② Save these probes as "M4vsM8\_p0.01"

# Uploading user data to aid the investigation

File Gene Sets View Tools Help / feedback

Start | Sample groups | **View data** | Compound ranking | Pathologies | Sample details | **My data**

Here you can inspect expression values for the sample groups you have defined. Click on column headers to sort data.

WY-14643\_M\_15day\_WY-14643/Middle/15 day | WY-14643\_M\_29day\_WY-14643/Middle/29 day | WY-14643\_M\_4day\_WY-14643/M... | WY-14643\_M\_8day\_WY-14643/Middle/8 day

Log2 (fold change) 1-25 of 618 Show More p-value columns M4vsM8\_p0.01 New Edit

WY-14643\_M\_4day WY-14643\_M\_8day Add T-Test Add U-Test Add fold-change difference Remove tests

| Gene Symbol         | Probe Title                                                 | Probe        | WY-14643_M... | WY-14643_M... | WY-14643_M... | WY-14643_M... |
|---------------------|-------------------------------------------------------------|--------------|---------------|---------------|---------------|---------------|
| Acot1               | acyl-CoA thioesterase 1                                     | 1368250_at   | 10.307        | 10.505        | 10.941        | 9.335         |
| Fbp2                | fructose-1,6-bisphosphatase 2                               | 1368622_at   | 6.078         | 5.799         | 4.471         | 6.139         |
| LOC100912489<br>Scd | stearoyl-CoA desaturase (delta-9-desaturase)                | 1367668_a_at | 4.985         | 6.295         | 0.636         | 2.891         |
| Hpgd                | hydroxyprostaglandin dehydrogenase 15 (NAD)                 | 1367631_at   | 4.595         | 3.303         | 1.831         | 4.185         |
| Asns                | asparagine synthetase (glutamine-hydrolyzing)               | 1367925_at   | 4.096         | 4.068         | 1.995         | 3.204         |
| Ald1a1              | aldehyde dehydrogenase 1 family - member A1                 | 1367022_at   | 3.688         | 3.437         | 3.251         | 3.654         |
| Ech1                | enoyl CoA hydratase 1 - peroxisomal                         | 1368885_at   | 3.354         | 3.451         | 3.212         | 3.611         |
| Ehhadh              | enoyl-CoA - hydratase/3-hydroxyacyl CoA dehydrogenase       | 1368283_at   | 3.044         | 3.139         | 3.129         | 3.557         |
| Acaa1a<br>Acaa1b    | acetyl-Coenzyme A acyltransferase 1B                        | 1367783_a_at | 2.744         | 3.016         | 2.894         | 3.253         |
| Sor1                | sortilin-related receptor - LDLR class A repeats-containing | 1394786_at   | 2.499         | 2.036         | 1.326         | 1.744         |
| Ten1                | TEN1 telomerase capping complex subunit                     | 1363230_at   | 2.456         | 3.131         | 0.812         | 1.949         |
| Miox                | myo-inositol oxygenase                                      | 1367937_at   | 2.308         | 2.581         | 2.701         | 2.03          |
| Lamc2               | laminin - gamma 2                                           | 1379340_at   | 1.889         | (absent)      | 1.031         | 2.952         |
| Inr5                | invariant 5                                                 | 1368742_at   | 1.411         | 1.368         | 0.888         | 1.491         |



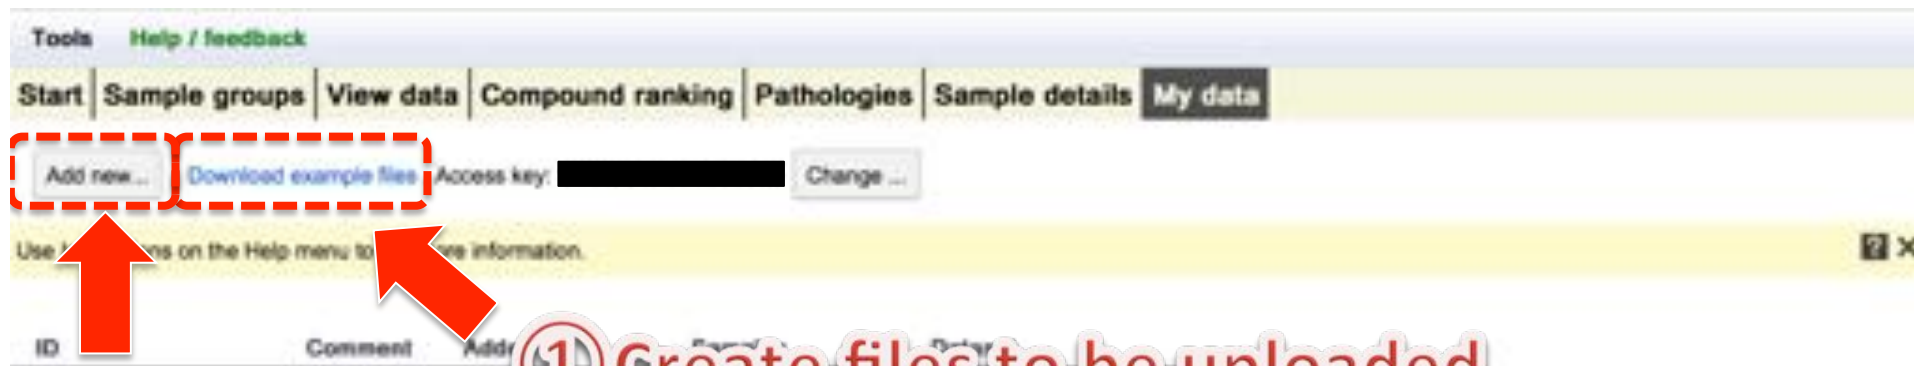

② Click

① Create files to be uploaded, by following the format of example files

**Edit batch**

ID: Amlodipine **1 Edit**

Private comments

Visibility: Private

Metadata file (TSV): Choose Files no files selected Please upload a file

Normalized data file (CSV): Choose Files no files selected Please upload a file **2 Upload the files**

Affymatrix calls file (CSV) (optional): Choose Files no files selected Please upload a file

OK Cancel **3 Click**

Sample details My data

Dataset



Note: If the uploaded data doesn't appear, click here and check the box of "My data"

Please define at one sample group per treatment group

Data...  Rat  In vivo  Liver  Repeat

① Newly appears in "Sample groups" page

cholesterol + 0.25% sodium

2,4-dinitrophenol

Amlodipine [user]

GW3965 [user]

PF-04923503

WY-14643

acarbose

acetamide

acetamidofluorene

acetaminophen

acetazolamide

adapin

alpraline

allopurinol

allyl alcohol

amiodarone

Sort by name Select all Unselect all

② Save WY-14643 single dose data and Amlodipine data as introduced above

| Active                              | Group            | #Treated samples | #Control samples | Edit | Delete |
|-------------------------------------|------------------|------------------|------------------|------|--------|
| <input checked="" type="checkbox"/> | Amlodipin_L_24hr | 3                | 14               | Edit | Delete |
| <input checked="" type="checkbox"/> | Amlodipin_L_6hr  | 3                | 20               | Edit | Delete |
| <input checked="" type="checkbox"/> | Amlodipin_M_3day | 3                | 12               | Edit | Delete |
| <input checked="" type="checkbox"/> | WY-14643_M_15day | 3                | 3                | Edit | Delete |
| <input checked="" type="checkbox"/> | WY-14643_M_24hr  | 3                | 3                | Edit | Delete |
| <input checked="" type="checkbox"/> | WY-14643_M_29day | 3                | 3                | Edit | Delete |
| <input checked="" type="checkbox"/> | WY-14643_M_3hr   | 3                | 3                | Edit | Delete |
| <input checked="" type="checkbox"/> | WY-14643_M_4day  | 3                | 3                | Edit | Delete |
| <input checked="" type="checkbox"/> | WY-14643_M_6hr   | 3                | 3                | Edit | Delete |

Delete all groups Next: View data

③ Click

**② Click**

**③ Select**

**① If M4vsM8\_p0.01 (n=618) is not displayed, click "Gene Sets" and select M4vsM8\_p0.01**

| Gene Symbol | Probe Title                                                          | Probe      | Amlodipin_... | Amlodipin_... | Amlodipin_... | WY-14643_M_... |
|-------------|----------------------------------------------------------------------|------------|---------------|---------------|---------------|----------------|
| Cttnbp2     | cortactin binding protein 2                                          | 1382913_at | 0.906         | 0.138         | 0.233         | -0.418         |
|             |                                                                      | 1382236_at | 0.797         | 0.446         | -0.119        | 0.084          |
|             |                                                                      |            |               |               |               | -2.618         |
|             |                                                                      |            |               |               |               | 0.678          |
|             |                                                                      |            |               |               |               | 0.235          |
|             |                                                                      |            |               |               |               | 0.411          |
| Ald1a1      | aldehyde dehydrogenase 1 family - member A1                          | 1387022_at | 0.642         | 0.223         | -0.073        | 3.688          |
| Adh7        | alcohol dehydrogenase 7 (class IV) - mu or sigma polypeptide         | 1386072_at | 0.63          | 0.011         | -0.544        | 0.96           |
| Sv2b        | synaptic vesicle glycoprotein 2b                                     | 1389628_at | 0.572         | 0.444         | -0.164        | 0.221          |
| Plekhb2     | pleckstrin homology domain containing - family B (evectins) member 2 | 1376137_at | 0.548         | -0.902        | 0.318         | 0.56           |
| ipo5        | importin 5                                                           | 1396742_at | 0.516         | -0.664        | 0.567         | 1.411          |
|             |                                                                      | 1379544_at | 0.516         | 0.547         | -0.162        | 0.154          |
|             |                                                                      | 1386600_at | 0.5           | -0.061        | 0.499         | 0.319          |
| Dst         | dystonin                                                             | 1395274_at | 0.454         | -0.142        | 0.43          | 0.163          |
| Igaf6       | integrin - alpha 6                                                   | 1393558_at | 0.438         | -0.156        | 0.498         | 0.154          |

Heatmap

Value: Log2 fold change

1.87e4

Settings

Dendrogram

Log-axis

Row

Method: ward.D2

Distance: pearson

Column

Method: ward.D2

Distance: pearson

Update

Enrichment... Close Save as gene set...

③ Save the image file

① Select "ward.D2", "pearson" and click "Update"

② Select cut-off=6 by pointing and click

④ Save the gene lists as "M4vsM8\_p0.01\_cutoff6"

The screenshot shows a heatmap visualization with a dendrogram on the left. A vertical red dashed box highlights a column of data. A red arrow points from the 'Settings' panel to the 'Update' button. Another red arrow points from the 'Settings' panel to the 'Save as gene set...' button. A third red arrow points from the 'Settings' panel to the 'ward.D2' method dropdown. A fourth red arrow points from the 'Settings' panel to the 'pearson' distance dropdown. A fifth red arrow points from the 'Settings' panel to the 'Update' button. A sixth red arrow points from the 'Settings' panel to the 'Save as gene set...' button. A seventh red arrow points from the 'Settings' panel to the 'Update' button. A eighth red arrow points from the 'Settings' panel to the 'Save as gene set...' button.

① Click "Gene Sets" and select "M4vsM8\_p0.01\_cutoff6 1"

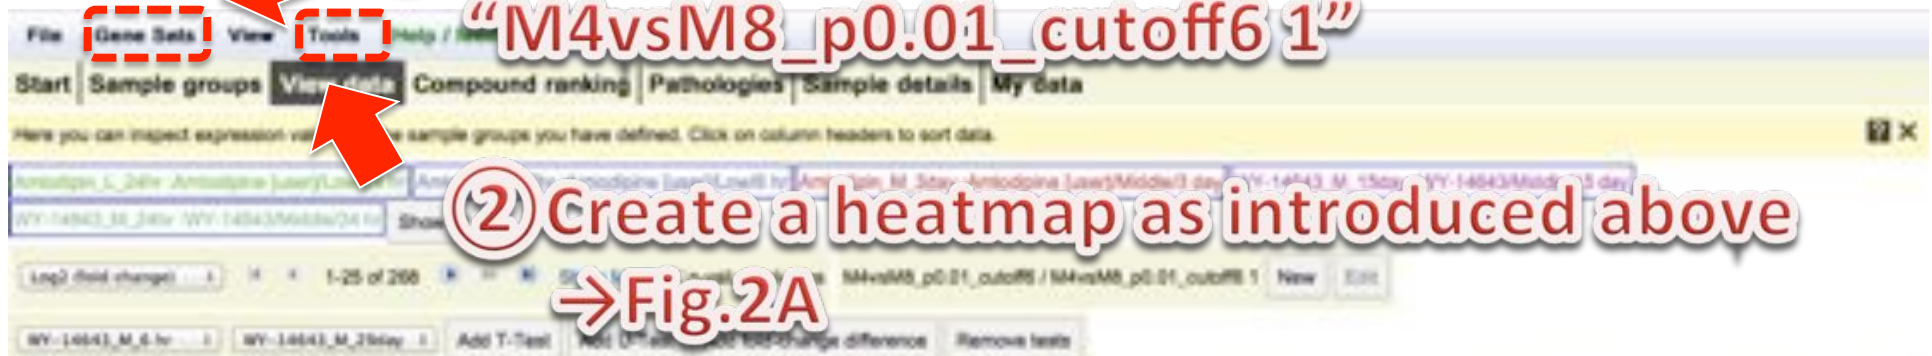

The screenshot shows a software interface with a menu bar at the top containing 'File', 'Gene Sets', 'View', and 'Tools'. The 'Gene Sets' menu is highlighted with a red dashed box, and a red arrow points to it. Below the menu bar, there are several tabs: 'Start', 'Sample groups', 'View', 'Compound ranking', 'Pathologies', 'Sample details', and 'My data'. The 'View' tab is active. Below the tabs, there is a text area with instructions: 'Here you can inspect expression values for the sample groups you have defined. Click on column headers to sort data.' Below this, there is a table with columns for 'Log2 fold change' and '1-25 of 266'. A red arrow points to the 'View' tab. Below the table, there are several buttons: 'Add T-Test', 'Add D-ratio', 'Add log2 fold change difference', and 'Remove tests'. The text 'M4vsM8\_p0.01\_cutoff6 1' is visible in the interface.

② Create a heatmap as introduced above  
→ Fig.2A

Fig.2B: Select M4vsM8\_p0.01\_cutoff6 2 and create a heatmap

Fig.2C: Select M4vsM8\_p0.01\_cutoff6 3 and create a heatmap

② export gene lists to TargetMine  
as introduced above

Supplementary Table 4: summary of pathway enrichment analysis by TargetMine  
(M4vsM8\_p0.01\_cutoff6 1,2,3)

Supplementary Table 5: gene list of M4vsM8\_p0.01\_cutoff6 1

Supplementary Table 6: gene list of M4vsM8\_p0.01\_cutoff6 2

Supplementary Table 7: gene list of M4vsM8\_p0.01\_cutoff6 3
